1 **Resilience of small intestinal beneficial bacteria to the toxicity of soybean oil fatty acids**

2

3 Sara C. Di Rienzi<sup>1,2</sup>, Juliet Jacobson<sup>2</sup>, Elizabeth A. Kennedy<sup>2</sup>, M. Elizabeth Bell<sup>2</sup>, Qiaojuan

4 Shi<sup>2</sup>, Jillian L. Waters<sup>1,2</sup>, Peter Lawrence<sup>3</sup>, J. Thomas Brenna<sup>3,4</sup>, Robert A. Britton<sup>5</sup>, Jens

5 Walter<sup>6,7</sup>, and Ruth E. Ley<sup>1,2,\*</sup>

6

7 <sup>1</sup>Department of Microbiome Science, Max Planck Institute for Developmental Biology,

8 Tübingen 72076, Germany

9 <sup>2</sup>Department of Molecular Biology and Genetics, Cornell University, Ithaca, NY 14853, USA

10 <sup>3</sup>Division of Nutritional Sciences, Cornell University, Ithaca, NY 14853, USA

11 <sup>4</sup>Dell Pediatric Research Institute, Dell Medical School, University of Texas at Austin,

12 Austin, TX 78723, USA

13 <sup>5</sup>Department of Molecular Virology and Microbiology, Baylor College of Medicine, Houston,

14 TX 77030, USA

15 <sup>6</sup>Department of Agricultural, Food, and Nutritional Science, University of Alberta, Edmonton,

16 AB T6G 2R3, Canada

17 <sup>7</sup>Department of Biological Sciences, University of Alberta, Edmonton, AB T6G 2E1, Canada

18

19 \*Correspondence: Ruth E. Ley, Department of Microbiome Science, Max Planck Institute for

20 Developmental Biology, Tuebingen 72076, Germany. Tel: +49 7071 601 449

21 [rley@tuebingen.mpg.de](mailto:rley@tuebingen.mpg.de)

22

23

24 Keywords: *L. reuteri*, *L. johnsonii*, linoleic acid, microbiome, soybean oil, host-microbe

25 interactions, small intestine

26

27 **Abstract:**

28 Over the past century, soybean oil (SBO) consumption in the United States increased  
29 dramatically. The main SBO fatty acid, linoleic acid (18:2), inhibits *in vitro* the growth of  
30 lactobacilli, beneficial members of the small intestinal microbiota. Human-associated  
31 lactobacilli have declined in prevalence in Western microbiomes, but how dietary changes  
32 may have impacted their ecology is unclear. Here, we compared the *in vitro* and *in vivo*  
33 effects of 18:2 on *Lactobacillus reuteri* and *L. johnsonii*. Directed evolution *in vitro* in both  
34 species led to strong 18:2 resistance with mutations in genes for lipid biosynthesis, acid stress,  
35 and the cell membrane or wall. Small-intestinal *Lactobacillus* populations in mice were  
36 unaffected by chronic and acute 18:2 exposure, yet harbored both 18:2- sensitive and resistant  
37 strains. This work shows that extant small intestinal lactobacilli are protected from toxic  
38 dietary components via the gut environment as well as their own capacity to evolve  
39 resistance.

40

41

## 42 **Introduction**

43 While antibiotics can cause lasting alterations to the microbiome (David et al 2014a,  
44 Dethlefsen et al 2008, Dethlefsen and Relman 2011, Jakobsson et al 2010), dietary  
45 perturbations rarely do so (Sonnenburg et al 2016). In humans and in mice, the gut  
46 microbiome can be quickly altered by diet but community composition generally recovers  
47 within days (Carmody et al 2015, David et al 2014a, David et al 2014b, Zhang et al 2012).  
48 Resilience to dietary perturbation may be direct, as gut microbes functionally adapt to diet, or  
49 indirect through buffering by the gut habitat.

50 During the 20<sup>th</sup> century, the greatest dietary change in the United States was in the  
51 consumption of soybean oil (SBO), which increased from less than 0.001 kg/person/year to  
52 12 kg/person/year (Blasbalg et al 2011). Conventional (“commodity”) soybean oil, frequently  
53 labeled as ‘vegetable oil’, is a mixture of triglycerides composed of five long chain fatty acids  
54 (FAs), with linoleic acid (18:2) comprising over 50% of the FAs. After triglycerides are  
55 hydrolyzed by lipases active in the saliva, stomach, and upper duodenum, free FAs and  
56 monoglycerides are absorbed in the small intestine (Mansbach et al 2000). The microbiota of  
57 the human small intestine is exposed to FAs during this process (El Aidy et al 2015, Kishino  
58 et al 2013): therefore, an increase in the concentration of specific FAs has the potential to  
59 reshape microbial communities and select for microbes that thrive in the novel environment.

60 Linoleic acid and the other two major unsaturated FAs in SBO, oleic acid (18:1), and  
61 alpha-linolenic acid (18:3), are known to be bacteriostatic and/or bactericidal to small  
62 intestinal bacteria as non-esterified (free) fatty acids *in vitro* at concentrations found in the  
63 small intestine (Kabara et al 1972, Kankaanpaa et al 2001, Kodicek 1945, Nieman 1954). The  
64 primary modes of killing include permeabilization of cell membranes (Greenway and Dyke  
65 1979) and interference with FA metabolism (Zheng et al 2005). Affected microbes are  
66 predominantly Gram-positive bacteria including the genus *Lactobacillus* (Nieman 1954).  
67 Lactobacilli are particularly important as they are considered beneficial members of the

68 human small intestine (Walsh et al 2008, Walter et al 2007, Walter et al 2011). They have  
69 been shown to be growth inhibited by the specific FAs present in SBO (Boyaval et al 1995,  
70 De Weirdt et al 2013, Jenkins and Courtney 2003, Jiang et al 1998, Kabara et al 1972,  
71 Kankaanpaa et al 2001, Kodicek 1945, Raychowdhury et al 1985). It is interesting to note that  
72 the human-associated *L. reuteri* underwent a population bottleneck that coincides with the  
73 increase in SBO consumption in the U.S. and is far less prevalent than it was in the past  
74 (Walter et al 2011). Despite its decline, *L. reuteri* and other lactobacilli persist in the small  
75 intestine of Western individuals, suggesting mechanisms to counter the inhibitory effects of  
76 FAs *in vivo*.

77 Here, we explored mechanisms of microbiome resistance to toxic dietary components  
78 with a focus on linoleic acid (18:2) toxicity to *L. reuteri* and *L. johnsonii*. Using an *in vitro*  
79 evolution assay, we assessed the capacity for these species to develop 18:2 resistance. To  
80 assess resistance in the host, we fed mice from two vendors diets high or low in 18:2 for 10  
81 weeks and exposed their intestinal microbes to acute dosing of 18:2 via gavage. Lactobacilli  
82 populations were quantified in live-only and whole cell fractions obtained from the small  
83 intestine, and isolates from mice were assessed for resistance *in vitro*.

84

85

## 86 **Results**

### 87 ***L. reuteri* strains show variable resistance to 18:2 *in vitro***

88 We confirmed the previously reported *in vitro* toxicity of long chain FAs towards *L.*  
89 *reuteri* by performing disc diffusion assays with the individual free FAs of soybean oil (SBO)  
90 using *L. reuteri* ATCC 53608. We observed growth inhibition of this strain by free 18:1, 18:2,  
91 and 18:3 (**Figure 1A**), and this inhibition occurred in the presence of completely hydrolyzed  
92 SBO (**Figure 1 – Figure supplement 1**). The two saturated free FAs 16:0 and 18:0 and  
93 glycerol did not interfere with growth. To determine if the inhibitory concentration of 18:2



94 was comparable to concentrations in the mammalian digestive tract, we performed a cell  
95 permeability assay using propidium iodide with *L. reuteri* ATCC 53608 over a 10-fold  
96 dilution range from 0.01 to 1000  $\mu\text{g/ml}$  of 18:2. We observed 18:2 permeabilized the cells  
97 with an estimated inhibitory concentration 50 (IC<sub>50</sub>) of 20  $\mu\text{g/ml}$  ( $p < 0.001$ ) (**Figure 1B**).  
98 This IC<sub>50</sub> concurs with our estimates of the concentration of 18:2 present in a mouse  
99 consuming a SBO diet (11 to 28  $\mu\text{g/ml}$  for a mouse on a 7% by weight SBO diet, see  
100 Materials and methods) and with previous estimates of mammalian physiological relevant  
101 concentrations of unsaturated FAs (Kankaanpaa et al 2001, Kodicek 1945). Thus,  
102 physiological levels of 18:2 were toxic to *L. reuteri in vitro*.

103 We next assessed 40 strains of *L. reuteri* for 18:2 resistance in liquid culture. These 40  
104 strains were previously isolated from humans, pigs, rodents (mice, rats), birds (chicken,  
105 turkey), and sourdough and stemmed from six different continents (**Supplementary File 1**)  
106 (Böcker 1995, Oh et al 2010). We quantified how the strains grew in 18:2 by taking the mean  
107 of the ratios for cells growing in 18:2 to cells growing in medium alone for each of the last  
108 three OD<sub>600</sub> measurements at hours ~4, 6, and 8 during the growth assay (see Materials and  
109 methods for a discussion on why this approach was used). *L. reuteri* strains have been shown  
110 to be host-specific and form host specific clades (Walter et al 2011). We observed that the  
111 basal, rodent-associated strains on average were inhibited by 18:2 more strongly than the  
112 other strains (Kruskal-Wallis test,  $p < 10^{-4}$ ) (**Figure 2**). However, we observed considerable  
113 variation within host sources, and the human-associated strains were no more resistant to 18:2  
114 than the strains derived from pig, poultry, or sourdough. Moreover, within human strains,  
115 18:2 resistance did not relate to *L. reuteri* isolation site (**Figure 2 – Figure supplement 1A**).  
116 There also did not appear to be a clear relationship of 18:2 resistance with *L. reuteri* clades as  
117 defined by Oh et al. (2010) (**Figure 2 – Figure supplement 1B**). Overall, we observed  
118 variation in *L. reuteri* 18:2 resistance regardless of source.

119

120 **Evolved 18:2 resistance is associated with mutations in lipid-related, acid stress, and cell**  
121 **membrane/wall genes**

122 To directly test if 18:2 resistance could evolve in *L. reuteri* through exposure to 18:2,  
123 we isolated an 18:2-sensitive *L. reuteri* strain (LR0) from the jejunum of a conventionally-  
124 raised mouse (see Materials and methods). We seeded five cultures with LR0 and passaged  
125 them twice daily from a growth-dampening concentration of 18:2 up to a growth-inhibitory  
126 concentration over a period of six weeks (**Figure 3A** and **Figure 3 – Figure supplement 1**).  
127 We also evolved five cultures of *L. johnsonii* strain (LJ0) obtained from the same mouse. We  
128 selected *L. johnsonii* based on its high abundance in mouse small intestinal microbiota (see  
129 below). At the end of the passaging regime, all of the evolved lactobacilli populations showed  
130 smaller zones of inhibition around 18:2 and 18:3 in a disc diffusion assay compared to their  
131 respective starting strains (**Figure 3B** and **Figure 3 – Figure supplement 2A**). We tested  
132 isolates LR2-1 from population LR2 and LJ41072 from population LJ4 in liquid culture  
133 supplemented with 18:2 to confirm their 18:2 resistance (**Figure 3C** and **3D**).

134 To characterize the mutations these populations acquired, we sequenced all five of the  
135 *L. reuteri* populations, four of the five *L. johnsonii* populations (the fifth was lost), the  
136 evolved isolates LR2-1 and LJ4107, and the starting strains LR0 and LJ0, using 300 bp paired  
137 end sequencing on an Illumina MiSeq. For the populations, we achieved approximately 500X  
138 coverage, and for the isolates, 50X coverage (**Supplementary File 2**). Mutations were called  
139 in the populations and isolates by aligning sequencing reads to the assembled genome for the  
140 respective starting strain (LR0 or LJ0). After requiring mutations have a minimum frequency  
141 of 10% in a population and confirming all mutations were not due to potential mismapping,  
142 we observed 30 mutational events in 15 genes across the five *L. reuteri* populations and 35  
143 mutational events in 21 genes in the four *L. johnsonii* populations. (**Supplementary Files 3**  
144 **and 4**).

145 In each population, a few mutations had swept the entire population (**Tables 1, 2,**  
146 **Supplementary Files 3 and 4**). Both the *L. reuteri* and *L. johnsonii* populations bore high  
147 frequency variants (>60%) in genes relating to FA metabolism, ion transport, and the cell  
148 membrane/wall. In the *L. reuteri* populations, we found high frequency variants in (i) FA  
149 biosynthesis transcriptional regulator *FabT* (Eckhardt et al 2013), (ii) two related tyrosine-  
150 protein kinases involved in exopolysaccharide synthesis, *EpsD*, and *EpsC* (Minic et al 2007),  
151 (iii) an HD family hydrolase, (iv) a hypothetical protein, and (v) in the region upstream of an  
152 ammonium transporter that may respond to acid stress (Wall et al 2007). In the *L. johnsonii*  
153 populations, high frequency mutations were present in (i) two distinct intracellular lipases, (ii)  
154 a putative membrane protein gene, (iii) the potassium efflux system *KefA*/small-conductance  
155 mechanosensitive channel, which protects against growth defects in acidic conditions (Cui  
156 and Adler 1996, McLaggan et al 2002), (iv) the glycosyltransferase *LafA*, which affects the  
157 lipid content of the cell wall and membrane (Webb et al 2009), (v) a *TetR* family  
158 transcriptional regulator, and (vi) the ribonucleotide reduction protein *NrdI*. All but two of the  
159 above mutations are non-synonymous or cause protein truncations. The other two mutations  
160 are intergenic and thus may alter the expression of the downstream gene. The isolate LR2-1  
161 contained both of the mutations present at high frequencies in the total LR2 population as  
162 well as an additional mutation in a hypothetical protein, which was present in the LR2  
163 population at 45% (**Supplementary File 3**). Similarly, LJ41072 had all of the high frequency  
164 mutations present in its source population (LJ4) and one additional mutation in *LafA*, which  
165 was mutated in 39% of the LJ4 population (**Supplementary File 4**). We observed no overlap  
166 in the specific genes mutated in *L. reuteri* and *L. johnsonii*. Only a subset of the genes  
167 mutated in one species are present in the other species (*EpsD*, *EpsC*, FIG00745602, *LafA*) and  
168 in no case was the same mutation already present in the opposite species. Although the  
169 specific genes mutated differed between the two species, they are associated with similar

170 functions, suggesting that *Lactobacillus* species can evolve 18:2 resistance through changes  
171 relating to lipid metabolism, acid stress, and the cell wall/membrane.

172 To confirm the role of these genes in fatty acid resistance, we generated these mutations  
173 individually in a fatty acid sensitive background. The human derived *L. reuteri* ATCC PTA  
174 6475 (also called MM4-1A) is amenable to recombineering (van Pijkeren and Britton 2012).  
175 Of the genes mutated in *L. reuteri*, only FabT and the hydrolase gene are present in this strain.  
176 The amino acid sequences, but not the nucleotide sequences of these genes are identical  
177 between our mouse strain and *L. reuteri* 6475. We created the LR2 18 bp deletion in FabT,  
178 the LR5 SNP in FabT, and the LR5 SNP in the hydrolase gene. The latter two were  
179 accompanied by several surrounding synonymous mutations as recombineering is orders of  
180 magnitude more efficient when multiple consecutive mutations are made due to the avoidance  
181 of the mismatch repair system (van Pijkeren and Britton 2012). The specific mutations made  
182 are indicated in the recombineering oligos in **Figure 3 – Source data 1**. Note that these oligos  
183 match the reverse strand of the chromosome.

184 The LR2 18 bp deletion and the LR5 SNP in FabT present alone were able to enhance  
185 18:2 resistance in *L. reuteri* 6475, similar to that observed for the total LR2 and LR5  
186 populations (**Figure 3 – Figure supplement 2B**). The LR5 SNP in the hydrolase gene,  
187 however, was not sufficient to render the strain observably 18:2 resistant by a disc diffusion  
188 assay. We cannot rule out the possibility that the additional synonymous mutations we created  
189 in this strain impacted the phenotype or that mutation of the hydrolase gene enhances  
190 resistance in the background of a strain mutated for FabT. These results verify the role of the  
191 fatty acid transcriptional regulator FabT in *L. reuteri* 18:2 resistance.

192

### 193 ***L. reuteri* survives chronic and acute 18:2 exposure in the mouse**

194 Given that 18:2 resistance can evolve *in vitro*, we asked if *L. reuteri* and *L. johnsonii*  
195 could survive either a chronic or acute exposure to 18:2 *in vivo*. For the chronic exposure, 3

196 week-old male C57BL/6J mice from Jackson Laboratories were fed *ad libitum* for 10 weeks a  
197 low fat (LF, 16% kcal from SBO) or high fat (HF, 44% kcal from SBO) diet, wherein all of  
198 the fat was derived from SBO (**Figure 4 – Source data 1**). For the acute exposure, at the end  
199 of the 10 weeks, we gavaged (delivered to the stomach) mice with 6 mg 18:2 per gram mouse  
200 weight (e.g., double the 18:2 consumed by mice daily on the LF diet) or saline. At 1.5 hours  
201 post-gavage, when gavaged 18:2 is observed in the blood stream (**Figure 4 – Figure**  
202 **supplement 1**), mice were sacrificed, and the small intestine contents were collected (**Figure**  
203 **4A**).

204 To assess how the gavage impacted the microbiome of the jejunum, where the bulk of  
205 fat absorption occurs (Alfin-Slater and Aftergood 2012, Borgstrom et al 1962), we sequenced  
206 the V4 region of 16S rRNA genes derived from DNA obtained from propidium monoazide  
207 (PMA) treated and untreated aliquots of each jejunal luminal sample. The PMA or “live-only”  
208 aliquot, is depleted of DNA from cells with compromised membranes. In addition to live  
209 cells, the untreated or “total” aliquot includes DNA from live as well as cells permeabilized  
210 by 18:2 and dead cells. This approach allowed us to gauge which taxa were still alive after the  
211 18:2 treatment.

212 The effect of 18:2 on the microbial community was evident from analysis of the live  
213 cells but not for the total cell population: microbiomes within a diet-group could be  
214 distinguished by gavage treatment only when the live-only aliquot was analyzed (live-only;  
215 weighted UniFrac,  $n = 23$  for LF diet: adonis, pseudo-F = 4.78, 15% of variance explained,  $p$   
216 = 0.022;  $n = 21$  for HF diet: adonis, pseudo-F = 7.84; 28% of variance explained,  $p = 0.003$ ;  
217 also see **Figure 4 – Figure supplement 2A and B**). This observation suggests that 18:2  
218 compromised select microbes, thereby decreasing their abundances and altering the  
219 abundances of other live microbes. Such differences in microbial abundances due to the 18:2  
220 gavage should be evident by directly comparing the total and live-only aliquots for each  
221 sample. Indeed, we observed that for both diets, although the jejunal contents from saline-

222 gavaged mice showed differences in the live-only and total diversity, this difference was  
223 greater in mice gavaged with 18:2 ( $p < 0.01$  for LF diet,  $p < 10^{-7}$  for HF diet, Kruskal-Wallis  
224 tests) (**Figure 4B**). Hence, while compromised cells exist in the saline control animals, 18:2  
225 caused additional cells to be compromised. We note that this difference (beta-diversity  
226 distance) was greater for the HF than the LF diet samples (**Figure 4B**), suggesting that the  
227 HF-diet conditioned microbiome was disrupted to a greater extent by 18:2 than the LF-diet  
228 microbiome.

229 The LF versus HF SBO diets themselves, on the other hand, had little effect on the  
230 microbiome. While the mice on the HF diet gained significantly more fat mass ( $p = 1.53 \times 10^{-4}$ ,  
231 mean in HF diet group = 0.043, mean in LF diet group = 0.028, 95% CI = (0.0076, 0.0218),  
232 two-sample, two-tailed t-test on epididymal fat pad mass), we observed no differences  
233 between the total microbiome composition of the jejunum of mice on the two diets  
234 (PERMANOVA on the total cell population,  $p > 0.5$ ). Using a Kruskal-Wallis test, with FDR  
235  $< 0.1$ , we observed that OTU 363731 mapping to *Akkermansia muciniphila* was 60-fold  
236 enriched in the HF diet. These results imply that the level of SBO and compensatory  
237 reduction in carbohydrates in the HF diet was not sufficient to greatly alter the microbiome.

238 OTUs 692154 and 592160, taxonomically assigned by Greengenes to *L. reuteri* and *L.*  
239 *johnsonii*, respectively, were the two most abundant lactobacilli OTUs in all samples. These  
240 OTUs displayed comparable relative abundances in the two diets (total aliquot; Kruskal-  
241 Wallis test and ANOVA on a linear mixed model to include cage effects,  $p$  values  $> 0.05$ ,  
242 **Figure 4C and D**). These *L. reuteri* and *L. johnsonii* OTUs were present in the 18:2, live-only  
243 microbiota in both sets of mice (**Figure 4C and D**), suggesting these taxa survived the 18:2  
244 acute treatment regardless of the dietary fat content. Note we detected *L. reuteri* OTU 692154  
245 at very low levels in the microbiota of mice housed in three out of six LF diet cages and in  
246 two out of six HF diet cages (**Figure 4 – Figure supplement 2C**). Comparison of the relative  
247 abundance of these two OTUs in the total and live-only microbiota revealed these lactobacilli

248 (with the exception of *L. reuteri* in the LF diet) enriched 2- to 5-fold (ANOVA on a linear  
249 mixed model to include cage effects and Kruskal-Wallis tests, p values < 0.01) after 18:2  
250 gavage. Furthermore, the live-only microbiota of HF diet mice had an enrichment of 11  
251 lactobacilli OTUs after 18:2 gavage (5- to 9-fold enrichment compared to control gavage,  
252 Kruskal-Wallis, FDRs < 0.1, **Figure 4 – Figure supplement 2D**) at the expense of  
253 *Allobaculum spp.* Similar enrichment of live lactobacilli after the 18:2 gavage was observed  
254 for the LF diet, although no OTU passed our significance threshold. These observations  
255 suggest that lactobacilli resist acute 18:2 exposure particularly in the context of a high-18:2  
256 diet.

257 To confirm that the *Lactobacillus* population was not reduced by the 18:2 gavage and  
258 that any changes in their relative abundances were due to die-offs of other bacteria, we  
259 quantified their levels in total and live cell fractions by qPCR. We determined the difference  
260 in the copy number of *Lactobacillus* 16S rRNA sequences in the total and live-only samples  
261 normalized to the equivalent difference for total Eubacteria. We observed no difference  
262 between the saline and 18:2 gavage samples for either diet (**Figure 4 – Figure supplement**  
263 **2E**, two-sample, two-tailed t-test, p values > 0.1). All live-only to total relative copy numbers  
264 were close to 1, as expected if the *Lactobacillus* population was not reduced by 18:2  
265 exposure.

266 To determine if our findings were limited to our specific mouse experiment, we  
267 repeated the chronic 18:2 exposure with two additional sets of mice originating from Taconic  
268 Biosciences and an F2 generation of mice from Jackson Laboratories. In these two additional  
269 sets of mice, 16S rRNA gene sequence diversity analysis of jejunal contents showed that the  
270 same two OTUs annotated as *L. reuteri* and *L. johnsonii* were again the predominant  
271 lactobacilli, although these are extremely unlikely to be same lactobacilli strains as present in  
272 our first study. In Taconic mice, *L. reuteri* and *L. johnsonii* were detected in the jejunum after  
273 10 weeks on both diets (**Figure 4 – Figure supplement 3A and B**). In F2 Jackson mice, *L.*



274 *johnsonii* was detected after 10 weeks on both diets (**Figure 4 – Figure supplement 3C**),  
275 whereas *L. reuteri* was only present in LF diet mice (**Figure 4 – Figure supplement 3D**). *L.*  
276 *reuteri*, however, was not observed in fecal samples from week 0 (**Figure 4 – Figure**  
277 **supplement 3E**). As all mice were similarly handled, the diets sterilized, and the mice bred in  
278 the same facility, *L. reuteri* may have invaded the LF mice, though we cannot rule out the  
279 possibility of *L. reuteri* existing below detection. Nevertheless, these additional studies  
280 support the notion that lactobacilli populations are minimally impacted by chronic dosing of  
281 18:2.

282

283 ***L. reuteri* isolated from SBO diet mice are sensitive to 18:2, but HF diet isolates show**  
284 **increased 18:2 resistance**

285 Our results in mice suggest that *L. reuteri* and *L. johnsonii* survived chronic and acute  
286 exposure to 18:2 either directly, by 18:2 resistance, or indirectly, through an unknown aspect  
287 of life within the mouse gut. To assess the direct resistance of these lactobacilli to 18:2, we  
288 established a collection of *L. reuteri* and *L. johnsonii* isolates derived from the upper ileum  
289 (as a proxy for the jejunum) of mice on both HF and LF diets. We determined the ability of  
290 these isolates to grow in liquid culture amended with 18:2. While most isolates were sensitive  
291 to 18:2, we observed that *L. reuteri* isolates recovered from the HF-diet fed mice were on  
292 average more resistant to 18:2 than *L. reuteri* isolated from the LF-diet fed mice (113 isolates  
293 from 15 mice in 8 cages Kruskal-Wallis,  $p < 0.05$ , **Figure 4E** and **Figure 4 – Figure**  
294 **supplement 4A**). This observation is consistent with the hypothesis that chronic exposure to a  
295 diet high in 18:2 promotes resistance in the resident *L. reuteri* population.

296

297 **Lactobacilli population-level 18:2 resistance *in vivo* does not predict the resistance of**  
298 **isolates *in vitro***



299 Next, we sought to relate the *in vitro* resistance of the *L. reuteri* isolates to the *in vivo*  
300 changes in *L. reuteri* populations before and after acute 18:2 exposure. To do so, we assessed  
301 the enrichment of *L. reuteri* OTU 692154 in the live jejunal aliquot post 18:2 gavage: we  
302 considered the rarified sequence counts for this OTU in the live-only aliquot (i.e., in PMA-  
303 treated samples) in mice gavaged with 18:2 normalized by the equivalent sequence counts for  
304 the OTU in saline gavaged co-caged mice. A resulting  $\log_{10}$  ratio greater than 0 indicates that  
305 live *L. reuteri* OTU 692154 had greater relative abundance counts in mice gavaged with 18:2  
306 compared to same-cage controls gavaged with saline, signifying that other OTUs had been  
307 depleted. We observed no correlation between the ability of these strains to grow *in vitro* in  
308 18:2 and their abundance in mice gavaged with 18:2 for mice on either diet (**Figure 4 –**  
309 **Figure supplement 4B and C**). Note that we cannot exclude the possibility that the isolation  
310 procedure favored susceptible strains, and thus is not representative of the *in vivo* population.  
311 With this caveat in mind, these results indicate that while chronic exposure to 18:2 can result  
312 in *L. reuteri* strains with higher 18:2 resistance, the mouse gut environment protects  
313 susceptible strains.

314 We partially replicated these findings with *L. johnsonii*: all isolates were sensitive to  
315 18:2, but *L. johnsonii* from the HF diet-fed mice were more strongly inhibited by 18:2 than  
316 those isolated from the LF-fed mice (159 isolates from 22 mice in 12 cages; Kruskal-Wallis,  $p$   
317  $< 0.001$ , **Figure 4E**). Therefore, the results for *L. johnsonii* are similar to those of *L. reuteri*,  
318 with a lack of congruence between the response of the population *in vivo* and the resistance of  
319 isolates *in vitro*.

320

### 321 **Putative fatty acid responsive genes are mutated in HF diet isolated *L. reuteri***

322 We sequenced to 50X coverage an isolate of *L. reuteri* resistant to 18:2, derived from a  
323 HF diet mouse (strain LRHF, **Supplementary File 2, Figure 4 – Figure supplement 5**).

324 Although we cannot be certain that HF diet-isolated *L. reuteri* share a common ancestor with

325 those present in LF diet mice, we compared LRHF to LR0, the 18:2-susceptible isolate from a  
326 LF diet mouse and used in the *in vitro* evolution assay. The comparison revealed 71 mutations  
327 in 60 genes with functions predominantly in DNA metabolism, energy metabolism, and  
328 environmental response (**Table 3, Supplementary File 3**). None of the genes mutated in the  
329 *in vitro* evolution assay differed between LR0 and LFHF. LRHF exhibited mutations in a  
330 sodium-hydrogen antiporter gene and a peroxide stress (*PerF*) gene, both of which may  
331 represent adaptation to an acidic environment caused by exposure to FAs. Of potential  
332 relevance to FA exposure, we observed mutations in a membrane-bound lytic murein  
333 transglycosylase D precursor involved in the production of the peptidoglycan layer (Vollmer  
334 et al 2008) and the fructosyltransferase *Ftf* involved in the production of exopolysaccharide  
335 (Sims et al 2011). These results suggest that exposure to 18:2 *in vivo* does not invoke  
336 selection on the same genes that are implicated in 18:2 resistance *in vitro*.

337

## 338 **Discussion**

339 A drastic change in dietary macronutrient composition has the capacity to restructure  
340 the microbiome within a day (David et al 2014b, Faith et al 2011, Turnbaugh et al 2009) and  
341 is one of the most influential contributors to microbiome composition (Carmody et al 2015).  
342 Here, we consider how the gut microbiome is influenced by diet from the perspective of a  
343 single FA known to be toxic to gut microbes: specifically, the interaction between lactobacilli  
344 and linoleic acid (18:2). In accord with previous reports, we observed 18:2 to inhibit the  
345 growth of most naturally-derived lactobacilli *in vitro*. However, in the mouse gut, *L. reuteri*  
346 and *L. johnsonii* persisted through both chronic and acute exposures to 18:2. *L. reuteri*  
347 isolates derived from mice on a diet high in 18:2 included some that were more resistant to  
348 18:2. This observation suggests that 18:2 resistance has the potential to be selected in a host.  
349 *In vitro*, *L. reuteri* and *L. johnsonii* both evolved 18:2 resistance through mutations in the cell  
350 wall/membrane and fat metabolism genes. Collectively, these data indicate that the host gut

351 environment protects gut microbes from the inhibitory effects of FAs, but that these microbes  
352 can also evolve resistance, providing additional resilience.

353       The mutations our 18:2 *in vitro* adapted lactobacilli strains acquired are consistent with  
354 the known bacteriostatic and bactericidal mechanisms of 18:2: by increasing membrane  
355 fluidity and permeability (Greenway and Dyke 1979) potentially leading to cell lysis or  
356 leakage (Galbraith and Miller 1973b, Parsons et al 2012), by blocking absorption of essential  
357 nutrients (Nieman 1954), and by inhibiting FA synthesis (Zheng et al 2005) and oxidative  
358 phosphorylation (Galbraith and Miller 1973a). Lactobacilli are also capable of combating  
359 18:2 toxicity by converting 18:2 to conjugated 18:2 and subsequently a monounsaturated or  
360 saturated fatty acid (Jenkins and Courtney 2003, Kishino et al 2013). We did not recover any  
361 mutations in genes known to be involved in the production of conjugated 18:2.

362       Despite the toxicity of 18:2 towards lactobacilli, mouse-associated *L. reuteri* and *L.*  
363 *johnsonii* were present at equivalent relative abundances in mice fed diets high or low in 18:2.  
364 Moreover, these microbes survived a gavage of 18:2 equal to double what mice normally  
365 encounter in their daily diet. Our results are consistent with the findings of Holmes and  
366 colleagues, who analyzed the fecal microbiomes of mice on 25 different SBO diets varying in  
367 their macronutrient (fat, protein, carbohydrate) composition. Their results demonstrate that fat  
368 has only a minor effect on microbiome structure (Holmes et al 2017). In contrast, in microbial  
369 systems engineered for waste processing, concentrations of linoleic acid within the range  
370 predicted to be consumed by animals can cause failure of the desired microbial  
371 biodegradation processes (Lalman and Bagley 2000). The resistance of lactobacilli to linoleic  
372 acid in the mouse host is therefore inferred to be dependent on the complexity of the gut  
373 habitat.

374       In mice, lactobacilli colonize both the small intestine and forestomach (Walter et al  
375 2007). While lingual lipases exist in mice (DeNigris et al 1988), fat digestion occurs primarily  
376 the small intestine. As a result, forestomach microbes should not be exposed to a high

377 concentration free FAs, and SBO itself is not toxic. A gavage of 18:2, on the other hand,  
378 exposes forestomach microbes to free 18:2. Lactobacilli may be protected from this direct  
379 exposure by their capacity to form a dense biofilm on non-mucus secreting stratified epithelial  
380 cells (Frese et al 2013). In the human host, other aspects of the small intestinal habitat likely  
381 buffer the microbiota.

382       The decline of *L. reuteri* in Western populations may never be fully explained. In the  
383 1960's and 1970's prior to the emergence of SBO as a major dietary fat source, *L. reuteri* was  
384 recovered from the intestinal tract of 50% of subjects surveyed and was considered a  
385 dominant *Lactobacillus* species of the human gut (Reuter 2001). Today, however, it is found  
386 in less than 10% of humans in the USA and Europe (Molin et al 1993, Qin et al 2010, Walter  
387 et al 2011), yet it is present at a reported 100% prevalence in rural Papua New Guineans  
388 (Martinez et al 2015). Moreover, human *L. reuteri* strains show very little genetic variation  
389 (Duar et al 2017, Oh et al 2010), and one human associated lineage of *L. reuteri* appears to  
390 have arisen approximately when SBO consumption increased (Walter et al 2011). These  
391 observations raise the question of whether a change in dietary habits drove the decline in the  
392 prevalence of *L. reuteri* in Western populations. In humans, *L. reuteri* forms neither high  
393 gastric populations nor biofilms (Frese et al 2011, Walter 2008), thus human-derived *L.*  
394 *reuteri* strains may have survived increased exposure to 18:2 by developing resistance.  
395 Indeed, we did observe that some human *L. reuteri* strains are resistant to 18:2, but not all.  
396 While the increase in SBO consumption may have conspired with other facets of  
397 modernization to reduce the prevalence of *L. reuteri* in Western populations, it did not appear  
398 to have resulted in a selective sweep of 18:2 resistant *L. reuteri*.

399       The mechanistic underpinnings of how dietary components shape the composition of  
400 the gut microbiome need to be further elucidated if manipulation of the microbiome for  
401 therapeutic applications is to succeed. Dietary components have the potential to inhibit  
402 microbes directly through their toxicity, or indirectly by promoting the growth of other, more

403 fit, microbes. While FAs are generally toxic to many lactobacilli, this work suggests that  
404 toxicity is greatly reduced when lactobacilli are host-associated. Future work in this area will  
405 elucidate how the host environment protects gut microbes from otherwise toxic dietary  
406 components such as FAs, and the ways specific strains within the microbiome can be resilient  
407 to such stresses.

408

## 409 **Materials and methods**

### 410 **Strains**

411 **Supplementary File 1** details the naturally derived *L. reuteri* strains from various  
412 hosts and countries. The *L. reuteri* strain (LR0) and *L. johnsonii* strain (LJ0) used in the *in*  
413 *vitro* 18:2 evolution assay were isolated from the jejunum contents of a mouse originally  
414 purchased from Taconic Biosciences (Hudson, NY, USA) and maintained on the low fat  
415 soybean oil diet for 6 weeks since weaning, and strain LRHF was isolated from a parallel  
416 mouse on the high fat soybean oil diet for 6 weeks since weaning (see Mouse care section for  
417 further details).

418

### 419 **Media and culturing**

420 Lactobacilli were cultured in MRS liquid medium (Criterion, Hardy Diagnostics,  
421 Santa Maria, CA, USA) or on MRS agar plates (Difco, BD, Sparks, MD, USA), pH-adjusted  
422 to 5.55 using glacial acetic acid. All liquid cultures and plates were incubated at 37°C in an  
423 anoxic chamber (Coy Lab Products, Grass Lake, MI, USA) supplied a gas mix of 5% H<sub>2</sub>, 20%  
424 CO<sub>2</sub>, and 75% N<sub>2</sub>.

425

### 426 **Disc diffusions**

427 We plated 100 µl of a dense, overnight culture of *L. reuteri* strain ATCC 53608 on an  
428 agar plate and applied sterile Whatman paper (Buckinghamshire, UK) discs to the surface of

429 the culture plate. To each disc, we added 10  $\mu$ l of each test compound or control. Compounds  
430 tested were alpha-linolenic acid (18:3) ( $\geq$  99%, L2376, Sigma Aldrich, St. Louis, MO, USA),  
431 linoleic acid (18:2) ( $\geq$  99%, L1376, Sigma Aldrich), oleic acid (18:1) ( $\geq$  99%, O1008, Sigma  
432 Aldrich), stearic acid (18:0) ( $\geq$  98.5%, S4751, Sigma Aldrich), palmitic acid (16:0) ( $\geq$  99%,  
433 P0500, Sigma Aldrich), 0.85% NaCl (saline), DMSO, glycerol, all afore mentioned FAs  
434 mixed (FA mix), the FA mix with glycerol, and soybean oil (Wegmans, NY, USA). FAs were  
435 dissolved in DMSO to a concentration of 50 mg/ml, except for stearic acid, which was  
436 dissolved to a concentration of 5 mg/mL due to its lower solubility. For the FA mix, the five  
437 FAs were mixed in the ratio that these FAs are present in soybean oil: 14% 16:0, 4% 18:0,  
438 23% 18:1, 52% 18:2, 6% 18:3. For the FA mix with glycerol, glycerol was mixed with the FA  
439 mix to a molar mass ratio of 0.1 (e.g., the molar mass ratio of glycerol in the total molar mass  
440 of soybean oil). For testing glycerol alone, the same amount of glycerol used in the FA mix  
441 with glycerol was used, and the total volume was brought up to 10  $\mu$ l with DMSO. Plates  
442 were dried for 20 min at 37°C before being turned agar side up and incubated overnight.

443

#### 444 **Live/dead assay**

445 First, we centrifuged 5 mL of an overnight culture of *L. reuteri* ATCC 53608 at  
446 10,000 rcf for 10 min and resuspended the pellets in 30 mL of 0.85% NaCl solution. Then we  
447 centrifuged 1 mL aliquots of the resuspended culture at 15,000 rcf for 5 min. The resulting  
448 pellets were resuspended in 0.85% NaCl solution to a total volume of 1 mL in the presence of  
449 18:2, 18:3, 0.85% NaCl, or ethanol. We diluted FAs in 100% ethanol in a ten-fold dilution  
450 series ranging from 0.01 to 1000  $\mu$ g/ml. We incubated samples at room temperature for 90  
451 min on a rocking platform (setting 6; VWR, Radnor, PA, USA) and inverted the samples by  
452 hand every 20 min to ensure adequate mixing. After exposure to the FA, we washed the cells  
453 by centrifuging at 15,000 rcf for 5 min, and resuspending the pellets in 1 mL 0.85% NaCl; we  
454 repeated this wash a second time. To measure the permeability of the cells, we stained

455 samples using the Live/Dead BacLight Bacterial Viability Kit (L7007, Invitrogen, Life  
456 Technologies, Grand Island, NY, USA) according to the manufacturer's instructions. We  
457 measured fluorescence from propidium iodide and SYTO9 on a BioTek Synergy H1 Hybrid  
458 Reader (BioTek Instruments, Inc., VT, USA). At each FA concentration, fluorescence was  
459 read in triplicate (technical replicates). We used the drc package (Ritz et al 2015) in R (Team  
460 2016) for dose-response modeling and statistical analyses.

461

#### 462 **Estimated concentrations of linoleic acid in the mouse small intestine**

463         The mice in this study consumed on average 2.7 grams of mouse food per day.  
464 Therefore, mice on a 23% by weight soybean oil mouse diet (the 44% by calorie HF diet),  
465 consume 0.62 grams SBO. In SBO, fatty acids comprise 90% of the molar mass. As 52% of  
466 the fatty acids in SBO are 18:2, therefore in a day, a mouse consumes ~ 0.3 grams 18:2. We  
467 estimated that the transit time of fat from feeding and into the blood stream is approximately  
468 1.5 hours (**Figure 4 – Figure supplement 1A**). Using the approximation that food is  
469 consumed continuously over the course of the day, we expect 18 µg of 18:2 to pass through  
470 the small intestine in a 1.5 hour period. The volume of the small intestine is between 200 to  
471 500 µl (McConnell et al 2008) and therefore approximately 36 to 91 µg/ml 18:2 will pass  
472 through the small intestine in a transit time. For the 7% by weight SBO diet (16% by calorie  
473 LF diet), 11 to 28 µg/ml 18:2 will pass in a transit time.

474

#### 475 **Linoleic acid liquid growth assay**

476         We inoculated a *Lactobacillus reuteri* or *L. johnsonii* colony grown 1 to 2 days on an  
477 MRS agar plate into a well containing 300 µl MRS liquid medium on a sterile 2 ml 96 well  
478 polypropylene plate (PlateOne, USA Scientific, FL, USA). We covered the plate with  
479 Breathe-Easy polyurethane film (USA Scientific, FL, USA) and incubated the plate overnight  
480 at 37°C in an anoxic chamber (Coy Lab Products, Grass Lake, MI, USA) supplied a gas mix



481 of 5% H<sub>2</sub>, 20% CO<sub>2</sub>, and 75% N<sub>2</sub>. Following overnight growth, we split the cultures 100-fold  
482 into a new 96 well plate, whereby each overnight culture was diluted into a well containing  
483 MRS medium and to a well containing MRS medium plus 1 mg/ml linoleic acid. To emulsify  
484 the FA in solution, prior to and following inoculation, we vortexed the 2 ml plate on a Multi-  
485 Tube Vortexer (VWR, PA, USA) for 30 seconds at setting 3.5. We then transferred the entire  
486 plate to a 300 µl Microtest Flat Bottom non-tissue treated culture plate (Falcon, Corning, NY,  
487 USA). We measured the OD<sub>600</sub> of the plate on a BioTek Synergy H1 Hybrid Reader (BioTek  
488 Instruments, Inc., VT, USA) at approximately 0, 2, 4, 6, and 8 hours. For growth curves of  
489 strains LR0, LR2-1, LRHF, LJ0, and LJ41072, cultures were read in triplicate (technical  
490 replicates).

491 We quantified how well the strain grew in 18:2 compared to the without 18:2 control  
492 by analyzing the last three time points of the growth assay. We used this approach over fitting  
493 a doubling time because, in the first few points of the growth curve, the OD values in wells  
494 with cells and 18:2 were lower than those in inoculation-control wells (e.g., with 18:2, but  
495 lacking cells). Hence, for the first few time points when subtracting the OD<sub>600</sub> of medium  
496 with 18:2, without cells from the OD<sub>600</sub> of medium with 18:2, with cells, we obtained  
497 negative OD<sub>600</sub> values. As well, the time spent in log phase varied among the strains and  
498 proper modeling of log to late-log phase could not be achieved without significant trimming  
499 and manipulation of the data. At these final three time points, we determined the ratio of the  
500 “blanked OD<sub>600</sub>s” for the strain growing in MRS medium with linoleic acid to the strain  
501 growing in MRS medium alone:

$$\frac{OD600_{MRS\ with\ 18:2}}{OD600_{MRS}}$$

502 We excluded time points in which the OD<sub>600</sub> in MRS medium alone was less than 0.1 (i.e.  
503 strain did not grow). We determined the mean of the above ratios for the last three time



504 points. All negative normalized cell densities were confirmed to result from negative values in  
505 the OD<sub>600</sub> of cells growing in 18:2.

506 For the naturally derived *L. reuteri* strains, we tested strains in triplicate to sextuplet  
507 (biological replicates) and averaged replicate normalized cell densities. For each *L. reuteri*  
508 and *L. johnsonii* strain isolated from mice on the SBO diet, we tested eight isolates from two  
509 mice per cage. The sample sizes for the SBO diet mice isolated strains were upper bounded  
510 by the observation that the microbiomes of these mice were dominated by one or few *L.*  
511 *reuteri/johnsonii* OTUs. Sixty-two isolates were tested between 2 and 5 times (biological  
512 replicates) and normalized cell densities were averaged across replicates. Statistical analyses  
513 were completed using `kruskal.test` in the R stats package (Team 2016).

514

#### 515 ***In vitro* evolution of 18:2 resistant lactobacilli**

516 For *L. reuteri* strain LR0 and *L. johnsonii* strain LJ0, both originating from a mouse  
517 on the LF SBO diet for 6 weeks, we inoculated a single colony into 5 ml MRS and grew the  
518 cultures overnight. The following day, we diluted the overnight cultures for LR0 and LJ0 100-  
519 fold, separately, into five 5 ml MRS medium supplemented with 5 mg/ml 18:2. These five  
520 cultures became the five populations evolved for *L. reuteri* or *L. johnsonii* and we refer to  
521 them as LR1-5 and LJ1-5, respectively. We passaged these cultures twice daily using a 100-  
522 fold dilution. We omitted an emulsifier (DMSO or ethanol) from this assay to avoid the  
523 possibility of the lactobacilli adapting to the emulsifier rather than to 18:2. As a result we  
524 needed to use a relatively high concentration of 18:2. To promote and maintain emulsification  
525 of the FA, we rigorously vortexed the tubes every few hours throughout the day. After seven  
526 days, we increased the concentration of 18:2 to 6 mg/ml. Each subsequent week, we increased  
527 the concentration by 1 mg/ml until reaching a final concentration of 10 mg/ml. Each week, we  
528 froze a 20% glycerol stock of each population at -80°C. We excluded *L. johnsonii* population  
529 #1, LJ1, from further study due to contamination.

530

531 **Whole genome sequencing of *Lactobacillus* populations and isolates**

532 We isolated genomic DNA from approximately 30 µl cell pellets frozen at -20°C  
533 using the Genra Puregene Yeast/Bact. Kit (Qiagen, MD, USA). For isolates, we grew a  
534 single 50 ml log to late-log phase culture from a single colony. For populations, we inoculated  
535 five 10 ml cultures directly from glycerol stock, grew the cultures to log to late-log phase, and  
536 thoroughly mixed the replicate cultures together before pelleting to aid in representing the  
537 diversity of original population structure. We grew 18:2-adapted isolates and populations in  
538 MRS medium with 10 mg/ml 18:2, and non-adapted isolates in MRS medium. We used the  
539 Genra Puregene Yeast/Bact. kit following the optional protocol adjustments: a 5 min  
540 incubation at 80°C following addition of the Cell Lysis Solution, a 45 min to 60 min  
541 incubation at 37°C following RNase A Solution addition, and a 60 min incubation on ice  
542 following addition of Protein Precipitation Solution. DNA was resuspended in Tris-EDTA  
543 and further purified using the Genomic DNA Clean & Concentrator™-25 (Zymo Research,  
544 CA, USA). We quantified isolated DNA using the Quant-it PicoGreen dsDNA Assay Kit  
545 (Thermo Fisher Scientific MA, USA). Lastly, to ensure we had obtained large molecular  
546 weight DNA, we ran the DNA on a 1% sodium borate agarose gel (Agarose I, Amresco, OH,  
547 USA).

548 We prepared barcoded, 350 bp insert libraries using the TruSeq DNA PCR-Free  
549 Library Preparation Kit (Illumina, CA, USA). We fragmented starting genomic DNA (1.4 µg)  
550 using the recommended settings on a Covaris model S2 (Covaris, MA, USA). The barcodes  
551 used for each library are indicated in **Supplementary File 2**. We submitted these barcoded  
552 libraries to the Cornell University Institute of Biotechnology Resource Center Genomics  
553 Facility where they were quantified by digital PCR using a QX100 Droplet Reader (Bio-Rad  
554 Laboratories, CA, USA), pooled (**Supplementary File 2**), and pair-end sequenced on an

555 Illumina MiSeq 2x300 bp platform using reagent kit V3 (Illumina, CA, USA). Resulting reads  
556 from libraries sequenced on multiple MiSeq runs were merged for further analyses.

557

### 558 **Genome assembly of *Lactobacillus* populations and isolates**

559 To generate reference genomes for the ancestor strains used in the *in vitro* evolution  
560 assay, we assembled paired-end sequences for *L. reuteri* LR0 and *L. johnsonii* LJ0 using  
561 SPAdes v3.7.1 (Nurk et al 2013, Prjibelski et al 2014) with k-mers 21, 33, 55, 77, 99, and 127  
562 using the “careful” option to reduce mismatches and indels. To select and order contigs, we  
563 aligned the assembled genomes against the closest complete genome available: NCC 533 for  
564 *L. johnsonii* and TD1 for *L. reuteri* as determined by a whole genome alignment using  
565 nucmer in MUMmer (Kurtz et al 2004). The assembled genomes we aligned against the NCC  
566 533 or TD1 genome using ABACAS.1.3.1 (Assefa et al 2009) with the “nucmer” program.  
567 Next, we aligned previously unaligned contigs using promer. We merged these sets of aligned  
568 contigs into one file and contigs with low coverage, less than 20, were removed. Finally, we  
569 ordered these filtered contigs using promer without the maxmatch option (-d) to prevent  
570 multiple reference-subject hits. For the LR0 genome, we identified a contig representing a  
571 plasmid from the assembly and included it in the set of assembled contigs. We uploaded these  
572 assembled genomes to RAST (Aziz et al 2008, Brettin et al 2015, Overbeek et al 2014) for  
573 annotation (see **Supplementary File 2** for details on the assembled genomes).

574

### 575 **Variant allele detection in 18:2 resistant lactobacilli**

576 First, we manually identified variant alleles in an isolate from *L. reuteri* population  
577 LR2, LR2-1, and an isolate from *L. johnsonii* population LJ4, LJ41072, using the Integrative  
578 Genomics Viewer (Robinson et al 2011, Thorvaldsdottir et al 2013). We used the variants in  
579 these isolates to calibrate the allele detection methods applied to the whole populations. Next,  
580 we identified variant alleles in the populations by aligning the paired-end sequence reads to

581 the ancestor genome (LR0 or LJ0) using BWA-MEM (Li and Durbin 2009). We marked  
582 duplicate sequences using Picard 2.1.1 (<http://broadinstitute.github.io/picard>) and utilized  
583 Genome Analysis Toolkit (GATK) (McKenna et al 2010), and the GATK Best Practices  
584 recommendations (DePristo et al 2011, Van der Auwera et al 2013) to accurately select true  
585 variants. This pipeline realigns indels and recalibrates and filters base calls using the known  
586 alleles identified in the isolates using a BQSR BAQ gap open penalty of 30. We used the  
587 GATK HaplotypeCaller to call alleles with the maxReadsInRegionPerSample option set  
588 utilizing the observed coverage binned across the genome by the GATK DepthOfCoverage  
589 script. We applied the following options for populations and isolates: pcr\_indel\_model was  
590 set to “NONE”, stand\_call\_conf was set at “10”, stand\_emit\_conf at “4”. For populations  
591 only, we set sample\_ploidy at “10” and for isolates, “1”. After we had separately processed all  
592 populations and isolates, we jointly called alleles across the entire set of populations and  
593 isolates using GenotypeGVCFs with sample\_ploidy at “10”, stand\_call\_conf at “10”, and  
594 stand\_emit\_conf at “4”.

595 We filtered these results to remove alleles with frequencies less than 10% and to  
596 remove alleles in genes annotated with “mobile element protein”, “transposase”, “phage”, or  
597 “RNA”. In addition, the ancestor genomic reads were mapped onto the ancestor genome to  
598 aid in the removal of poorly mapping reads. We removed alleles discovered in the evolved  
599 isolates and populations that were also present at frequencies greater than 0.5 in the aligned  
600 ancestor reads against the reference. The remaining alleles we manually checked using IGV to  
601 remove any alleles in regions of the genome with abnormally high coverage, compared to the  
602 directly adjacent regions, likely representing genomic repeat regions. Filtered and unfiltered  
603 reads are presented in **Supplementary Files 3 and 4**.

604

605 **Analysis of mutated genes**

606 We used PredictProtein (Yachdav et al 2014) to predict the cellular location and  
607 structure of hypothetical and putative proteins and SignalP 4.0 (Petersen et al 2011) to predict  
608 signal peptides sequences.

609

### 610 **Generation of *L. reuteri* mutants**

611 To test the role of the mutations discovered in the *in vitro* evolution experiment on  
612 fatty acid resistance, we recreated the *L. reuteri* mutations in the recombineering strain PTA  
613 6475 using the procedure described by van Pijkeren et al. (2012). Briefly, *L. reuteri* ATCC  
614 PTA 6475 (BioGaia AB, Sweden) bearing the plasmid pJP042, which has inducible RecT and  
615 is selectable with 5 µg/ml erythromycin, was induced with 10 ng/ml peptide pheromone  
616 (SppIP) (Peptide 2.0, VA, USA) at OD<sub>600</sub> 0.55-0.65. After washing the cells in 0.5 M sucrose,  
617 10% glycerol, we electroporated the cells with 100 µg of the recombineering oligo targeting  
618 the FabT or hydrolase gene and 40 µg of oligo oJP577 (van Pijkeren and Britton 2012), which  
619 targets *rpoB*, rendering the cells rifampicin-resistant. We electroporated in 0.2 cm Gene  
620 Pulser cuvettes (Bio-Rad, CA, USA) using a Bio-Rad Gene Pulser Xcell with conditions 2.5  
621 kV, 25 µF, and 400 Omega. We recovered cells for 2 hours at 37°C and then plated the cells  
622 on MRS supplemented with 25 µg/ml rifampicin and 5 µg/ml erythromycin.

623 We screened resulting colonies using either a restriction digest or primers specific to  
624 the mutation through mismatch amplification mutation analysis-PCR (MAMA-PCR) (**Figure**  
625 **3 – Source data 1**). For screening by restriction digest, we first amplified the FabT or  
626 hydrolase gene by colony PCR in 8 µl reactions: a small amount of a colony, 100 nM f.c. of  
627 each primer (see **Figure 3 – Source data 1**), and 1x Choice Taq Mastermix (Denville  
628 Scientific, MA, USA). PCR conditions were 94°C for 10 min, 35 cycles of 94°C for 45  
629 seconds, 56 or 58.5°C (see **Figure 3 – Source data 1**) for 1 min, and 72°C for 30 seconds,  
630 followed by a final extension at 72°C for 10 min. Reactions were held at 10°C and stored at  
631 4°C. Following, the PCR products were digested in 16 µl reactions at 37°C for 1 hour: 8 µl

632 PCR product, 0.2  $\mu$ l (4 units) MfeI (NEB, MA, USA), and 1x CutSmart Buffer (NEB). For  
633 screening by MAMA-PCR, PCRs were carried out as before except an additional primer  
634 specific to the mutation was included. We confirmed that the mutations were correct by  
635 Sanger sequencing (GENEWIZ, NJ, USA) the entire FabT or hydrolase gene using PCR  
636 conditions and primers previously described. The pJP042 plasmid was lost from cells by  
637 passaging in MRS.

638

### 639 **Mouse experiments**

640 All animal experimental procedures were reviewed and approved by the Institutional  
641 Animal Care and Usage Committee of Cornell University protocol 2010-0065.

642

### 643 **Mouse soybean oil diets**

644 The 16% and 44% SBO diets were custom designed by and purchased pelleted,  
645 irradiated, and vacuum packed from Envigo (formerly Harlan Laboratories, Inc., Madison,  
646 WI, USA, [www.envigo.com](http://www.envigo.com)). We stored open, in-use diet bags at 4°C and unopened, bags at  
647 -20°C. See **Figure 4 – Source data 1** for the diet compositions. The increase of SBO in the  
648 HF diet was compensated by a decrease in cornstarch (carbohydrate). Also, the amounts of  
649 protein (casein), vitamins, and minerals were increased in the HF diet to prevent nutritional  
650 deficiencies from arising: HF diet fed mice consume a more calorically dense diet and thus  
651 intake a smaller volume of food per body mass.

652

### 653 **Determination of transit time of fatty acids to the bloodstream**

654 We gavaged nine mice with 6 mg per gram mouse weight 18:2. Every half hour  
655 following gavage, we euthanized a mouse by CO<sub>2</sub> asphyxiation and collected blood by  
656 cardiac puncture. Blood was collected into EDTA coated tubes and stored on ice. Tubes were  
657 spun at 900 rcf at 4°C for 10 min, plasma was collected and stored at -80°C. We extracted

658 lipids using the Bligh and Dyer method (Bligh and Dyer 1959) and quantified FA methyl  
659 esters on a Hewlett-Packard 5890 series II gas chromatograph with a flame ionization detector  
660 (GC-FID) using H<sub>2</sub> as the carrier. See Su et al. (1999) for further details.

661 We used a linear mixed model to determine if the gavage treatments significantly  
662 altered the plasma levels of 18:2 and 18:3 in 1.5 hours. The model was *fatty acid mass ~ diet*  
663 *+ gavage + total fatty acid mass + (1/cage) + (1/GC run date) + (1/fatty acid extraction*  
664 *date) + plasma volume + (1/study)*, where the terms *cage*, *GC run date*, *fatty acid extraction*  
665 *date*, and *study* were handled as random effects and all others as fixed effects. *GC run date*  
666 refers to when the extracted fatty acids were run on the gas chromatograph, and *plasma*  
667 *volume* refers to the amount of mouse plasma used in the extraction. Models were run in R  
668 (Team 2016) using the lme4 package (Bates et al 2015) with REML = FALSE and the control  
669 optimizer set to “bobyqa”. Significance values were determined using a two-sample, two-  
670 tailed t-test (t.test in the R stats package (Team 2016) on the least squares means estimates  
671 data from the predict R stats function run on the model.

672

### 673 **Mouse care**

674 In this study, we used three sets of male C57BL/6 mice bred in three different  
675 facilities: Jackson Laboratories (Bar Harbor, ME, USA), Taconic (Hudson, NY, USA), and an  
676 F2 generation of mice originally purchased from Jackson Laboratories. At weaning (3 weeks  
677 of age), we split littermates into cages housing up to four mice and provided the mice either  
678 the LF (16% kcal SBO) or HF (44% kcal SBO) diet (**Figure 4 – Source data 1**). Littermates  
679 were split so to balance mouse weights within a cage and between the two diets. All mice  
680 were housed in the Accepted Pathogen Facility for Mice at Cornell University.

681 In total, 24 mice were purchased directly from Jackson Laboratories and maintained in  
682 6 cages on the LF diet and 24 mice in 6 cages on the HF diet; from Taconic, 12 mice in 3  
683 cages on the LF diet and 12 mice in 3 cages on the HF diet; and the F2 mice from Jackson



684 Laboratories were comprised of 11 mice in 5 cages on the LF diet and 15 mice in 5 cages on  
685 the HF diet. Sample sizes of five mice per group have been successful in delimiting diet-  
686 driven microbiome composition differences (Turnbaugh et al 2008). The three different sets  
687 of mice were maintained at distinct time periods with the goal of ensuring our findings were  
688 not specific to a given base-microbiota. Up to four mice were co-caged. We stocked cages  
689 with Pure-o-cel (The Andersons, Maumee, Ohio, USA), cotton nestlets, and plastic igloos so  
690 to avoid the introduction of exogenous fat. Food was placed in the cages and not on the wire  
691 racks to minimize loss and crumb buildup of the diets as the HF SBO diet does not maintain  
692 pelleted form. Twice weekly, we completely replaced cages and food. We weighed the  
693 amount of new food provided. To obtain mouse weights, we weighed mice in plastic beakers  
694 at the same approximate time of day twice weekly. We collected fresh fecal samples once  
695 weekly from the beakers into tubes on dry ice, which were later stored at -80°C. Mice were  
696 handled exclusively inside of a biosafety cabinet. We changed personal protective equipment  
697 and wiped all surfaces with a sterilant between cages to prevent cross-contamination. To  
698 measure food consumption, we filtered food crumbs out of the used bedding using a large  
699 hole colander followed by a fine mesh sieve, weighed the recovered food, and subtracted this  
700 amount from the known amount of food provided.

701         After 10 weeks on the SBO diets, we gavaged the Jackson Laboratory mice with  
702 saline (0.85% NaCl) or 18:2. The Taconic mice were gavaged with phosphate buffered saline  
703 (PBS) or 18:2, and the F2 mice from Jackson Laboratories with PBS, 18:2, or 18:3. The  
704 volume gavaged was 6 mg per gram mouse weight. The amount of FA gavaged is roughly  
705 double the amount of 18:2 consumed by mice on the LF diet each day, and more than half of  
706 the 18:2 consumed per day by mice on the HF diet. Within a cage, we gavaged half of the  
707 mice with a FA and the other half with saline/PBS, selecting which mouse received which  
708 gavage so to balance mouse weights between gavage groups. Following gavage, we moved



709 mice to a fresh cage supplied with water, but lacking food. After 1.5 hours, we euthanized  
710 mice by decapitation and harvested small intestines contents (see below).

711

### 712 **Processing of small intestine contents**

713 To harvest the jejunal contents, we divided mouse small intestines into three  
714 equivalent pieces. For Jackson Laboratory mice, we flushed the middle segment, the jejunum,  
715 with 10 ml anoxic 0.85% NaCl using a blunt, 18G, 1.5 inch needle into a 15 ml conical tube  
716 that we immediately placed on ice. After flushing, we quickly shook the tube and split its  
717 contents roughly equally into a second 15 ml conical tube. One of the tubes we covered with  
718 foil to which we added 12.5  $\mu$ l of propidium monoazide (PMA) (Biotium, Fremont, CA,  
719 USA; f.c. 50  $\mu$ M from a 2 mM stock dissolved in DMSO). Which tube received PMA, the  
720 original or the second, we alternated between mice. To the other tube, we added 12.5  $\mu$ l  
721 DMSO. To allow the PMA time to enter permeabilized cells, we placed all tubes on ice on a  
722 rocking platform for 5 min. To activate the azido group in PMA and cause DNA damage, we  
723 removed the foil from the tubes, placed the tubes horizontally on ice, and exposed the tubes  
724 for 5 min to a 650W halogen bulb (Osram 64553 C318, Danvers, MA, USA) positioned 20  
725 cm from the samples. We frequently rotated the tubes during these 5 min to ensure equal light  
726 exposure across the whole sample. We immediately spun these tubes at 4,500 rcf for 5 min at  
727 4°C. After we discarded the supernatant, we flash froze the tubes on liquid N<sub>2</sub>, placed them on  
728 dry ice, and later stored the tubes at -80°C. We also flushed the upper half of the last segment  
729 of the small intestine, the ileum, with MRS medium and 20% glycerol, immediately placed  
730 the glycerol stock on dry ice, which we later stored at -80°C. For the other mice, we flushed  
731 the jejunum with 10 ml anoxic PBS (pH 7.4) and did not use a PMA treatment. The small  
732 intestine contents for these mice were pelleted as described above.

733

### 734 **DNA isolation and 16S rRNA gene sequencing**

735 We used the PowerSoil DNA isolation kit (Mo Bio Laboratories, Carlsbad, CA, USA)  
736 to extract DNA from these jejunum pellets frozen in 2 ml tubes containing 0.1 mm glass  
737 beads (Mo Bio Laboratories, Carlsbad, CA, USA). We eluted the DNA on the spin filter using  
738 50 µl Solution C6 and stored the DNA at -20°C. We conducted blank extractions in parallel.  
739 We processed mouse fecal pellets in a similar manner.

740 We quantified DNA samples and blank extractions using the Quant-it PicoGreen  
741 dsDNA Assay Kit. For each sample, we performed two 50 µl PCRs to amplify the V4 region  
742 of the 16S rRNA gene using primers 515F (f.c. 100 nM), Golay barcoded 806R (f.c. 100 nM)  
743 (Caporaso et al 2012), 5 Prime Mix (Quanta Biosciences, CA, USA) or Classic++™ Taq  
744 DNA Polymerase Master Mix (TONBO biosciences, CA, USA), and 25 ng of DNA. PCR  
745 conditions were 94°C for 3 min, 30 cycles of 94°C for 45 seconds, 50°C for 1 min, and 72°C  
746 for 1.5 min, followed by a final extension at 72°C for 10 min. Reactions were held at 4°C and  
747 stored at -20°C.

748 We combined the two 50 µl PCRs and purified DNA using Mag-Bind® E-Z Pure  
749 (OMEGA Bio-tek, GA, USA) following the manufacturer's instructions and eluting with 35  
750 µl TE. We measured DNA concentrations using PicoGreen. We pooled 100 ng of amplicon  
751 DNA from each sample together and sequenced the pool using the Illumina MiSeq 2x250 bp  
752 platform at the Cornell Biotechnology Resource Center Genomics Facility.

753

#### 754 **16S rRNA gene amplicon analysis**

755 We processed, filtered, and analyzed the 16S rRNA gene amplicon data from all  
756 studies using QIIME 1.9.0 (Caporaso et al 2010). Paired-end reads were joined using  
757 `join_paired_ends.py` running the `fastq-join` method and requiring at least 200 bp of sequence  
758 overlap. Joined reads were demultiplexed using `split_libraries_fastq.py` requiring a Phred  
759 quality cutoff of 25 to remove ambiguous barcodes and low quality reads. Reads were  
760 clustered into operational taxonomic units (OTUs) using open-reference OTU picking at 97%

761 sequence identity to the Greengenes database version 13.8 (DeSantis et al 2006). We focused  
762 our analyses on the two most abundant lactobacilli OTUs: OTU 692154 identified as *L.*  
763 *reuteri* and OTU 592160 as *L. johnsonii* as denoted by the Greengenes assignment. We  
764 confirmed these assignments by sequencing the full 16S rRNA gene of lactobacilli isolates  
765 (see below).

766 Except where noted, for all subsequent analyses, we rarefied data to 40,000 sequences  
767 per sample. We calculated beta-diversity using the weighted UniFrac metric implemented in  
768 QIIME 1.9.0. We performed adonis (PERMANOVA) with 10,000 iterations and beta-  
769 diversity plots with the ordplot function using a t-distribution using the phyloseq package  
770 (McMurdie and Holmes 2013). We identified OTUs differentiating samples by first filtering  
771 OTU tables to only include those OTUs present in at least 25% of samples and with at least  
772 one sample having at least 100 counts of that OTU. To the filtered OTU tables, we applied a  
773 Kruskal-Wallis test with an FDR cutoff of 10% using the group\_significance.py script in  
774 QIIME. We created heatmaps of OTUs passing with FDR < 0.1 using the  
775 make\_otu\_heatmap.py script in QIIME. To detect *L. reuteri* in the fecal pellets of F2 mice  
776 from Jackson Laboratories, samples with at least 10,000 sequences were used (sequencing  
777 depth was lower for the fecal pellets), and data were not rarefied so to maximize detection of  
778 *L. reuteri*.

779

## 780 **qPCR analysis of lactobacilli copy number altered by PMA treatment**

781 We determined the copy numbers of the lactobacilli 16S rRNA gene and total  
782 Eubacterial 16S rRNA gene in the PMA and non-PMA treated jejunal aliquots by quantitative  
783 real-time PCR (qPCR) using the LightCycler 480 platform and the SYBR Green I Master kit  
784 (Roche Diagnostics Corporation, Indianapolis, IN, USA). We utilized the lactobacilli and  
785 Eubacterial primers described by Oh et al. (2012). PMA treatment reduces the total amount of  
786 DNA extracted by removing DNA from any dead cells. Thus, using the same mass of DNA

787 for the PMA and non-PMA aliquots would result in quantifying copy numbers relative to the  
788 total amount of DNA assayed, similar to the relative abundances determined from the 16S  
789 rRNA gene sequencing. Therefore, we fixed the amount of DNA used for all non-PMA  
790 samples to 10 ng. Thus, 10 µl qPCRs consisted of 10 ng of DNA for the non-PMA aliquots  
791 and equal volume for the PMA aliquot, each qPCR primer at 500 nM, and 5 µl of SYBR  
792 Green I Master mix. Cycling conditions were 5 min at 95°C followed by 45 cycles consisting  
793 of 10 s at 95°C, 20 s at 56°C for the Eubacterial primers and 61°C for the lactobacilli primers,  
794 and 30 s at 72°C after which fluorescence from SYBR Green was read. Melting curve  
795 analysis was used to determine whether each qPCR reaction generated a unique product.  
796 Cycle threshold ( $C_t$ ) values were calculated using the absolute quantification/ $2^{\text{nd}}$  derivative  
797 max function available on the LightCycler 480 software. All reactions were run in triplicate,  
798 and the mean  $C_t$  values were used in subsequent calculations.

799 To determine if the *Lactobacillus* population decreased due to the 18:2 gavage, we  
800 calculated the difference in lactobacilli copy number between the PMA (live-only cells) and  
801 non-PMA (total cells) aliquots relative to that for Eubacteria. That is,

$$\frac{2^{\Delta C_t \text{ Lacto}(PMA-non.PMA)}}{2^{\Delta C_t \text{ Eubac}(PMA-non.PMA)}}$$

802 If the *Lactobacillus* population is not affected by the 18:2 gavage, no difference should be  
803 observed between the saline and 18:2 gavage samples. Significance values between gavage  
804 groups were calculated using two-sample, two-tailed t-tests. Moreover, this ratio is expected  
805 to be close to one if lactobacilli were not specifically killed by the 18:2 gavage.

806

### 807 **Gavage ratio calculations**

808 For each cage, we split the mice according to which gavage they received (18:2 or  
809 saline) and we took the mean of the rarefied sequence counts for OTU 692154 (*L. reuteri*).

810 Then we calculated the  $\log_{10}$  of the ratio of the 18:2 mean rarefied sequence counts to the  
811 mean saline relative abundance sequence counts:

$$\log_{10} \frac{\text{mean 18:2 counts per cage for OTU}}{\text{mean saline counts per cage for OTU}}$$

812

### 813 ***L. reuteri* and *L. johnsonii* isolation from small intestine contents**

814 We streaked the glycerol stocks of mouse ileum contents onto MRS agar plates. One  
815 or two colony morphologies were present on nearly all plates: lowly abundant bright cream,  
816 round colonies present on most plates, and abundant flatter, dull white colonies present on all  
817 plates. We determined the species identity of these colony morphologies by full length 16S  
818 rRNA gene sequencing using primers 27F (f.c. 1 nM) and 1391R (f.c. 1 nM) (Turner et al.,  
819 1999), 10  $\mu$ l of Classic++™ Hot Start Taq DNA Polymerase Master Mix (Tonbo Biosciences,  
820 CA, USA), and a small amount of a single bacterial colony in a 25  $\mu$ l reaction. PCR  
821 conditions were 94°C for 3 min, 38 cycles of 94°C for 45 s, 50°C for 1 min, and 72°C for 1.5  
822 min, followed by a final extension at 72°C for 10 min. We purified PCRs using Zymo DNA  
823 Clean & Concentrator™-5 (Zymo Research, CA, USA) and submitted samples to Cornell  
824 University Institute of Biotechnology Sanger sequencing facility. Returned sequences were  
825 assembled using Sequencher® version 5.4.6 (DNA sequence analysis software, Gene Codes  
826 Corporation, Ann Arbor, MI, USA, <http://www.genecodes.com>) and aligned against National  
827 Center for Biotechnology Institute's nr database.

828

### 829 **Data deposition**

830 The lactobacilli raw sequencing reads and the assembled genomes for strains LR0 and  
831 LJ0 are available under BioProject accession PRJNA376205 at National Center for  
832 Biotechnology Institute. The RAST genome annotations for these genomes are available in  
833 **Supplementary Files 5 and 6**. The 16S rRNA gene amplicon data are available under the

834 study accession PRJEB19690 at European Nucleotide Archive. Code to generate figures,  
835 mutational analysis pipelines, and relevant raw data are available at  
836 [https://github.com/sdirienzi/Lactobacillus\\_soybeanoil](https://github.com/sdirienzi/Lactobacillus_soybeanoil) (Di Rienzi 2017).

837

838 **Abbreviations:** low fat (LF), high fat (HF), soybean oil (SBO), fatty acid (FA)

839

#### 840 **Acknowledgements**

841 We thank members of the Ley lab, as well as Jiyao Zhang, Donghao Wang, Andrew Clark,  
842 the staff of the Cornell Animal Facility, Jennifer Mosher, Sylvie Allen, Romano Miojevic,  
843 and Laura Ortiz-Velez for their assistance, helpful discussions, and insight.

844

#### 845 **Competing interests**

846 The authors declare no conflicts of interest.

847

#### 848 **Supplementary Files**

849

850 **Supplementary File 1. *L. reuteri* strains isolated from various hosts.**

851

852 **Supplementary File 2. Lactobacilli *in vitro* population sequencing.**

853

854 **Supplementary File 3. Filtered and unfiltered mutations in the *L. reuteri in vitro***  
855 **population and HF diet isolate sequencing data.**

856

857 **Supplementary File 4. Filtered and unfiltered mutations in the *L. johnsonii in vitro***  
858 **population sequencing data.**

859

860 **Supplementary File 5. RAST annotation for the assembled LR0 genome.**

861

862 **Supplementary File 6. RAST annotation for the assembled LJ0 genome.**

863

864

865

866 **References**

867

868 Alfin-Slater RB, Aftergood L (2012). *Nutrition and the Adult: Macronutrients*. Springer  
869 Science & Business Media: New York.

870

871 Assefa S, Keane TM, Otto TD, Newbold C, Berriman M (2009). ABACAS: algorithm-based  
872 automatic contiguation of assembled sequences. *Bioinformatics* **25**: 1968-1969.  
873 doi:10.1093/bioinformatics/btp347

874

875 Aziz RK, Bartels D, Best AA, DeJongh M, Disz T, Edwards RA, Formsma K, Gerdes S,  
876 Glass EM, Kubal M, Meyer F, Olsen GJ, Olson R, Osterman AL, Overbeek RA, McNeil LK,  
877 Paarmann D, Paczian T, Parrello B, Pusch GD, Reich C, Stevens R, Vassieva O, Vonstein V,  
878 Wilke A, Zagnitko O (2008). The RAST Server: rapid annotations using subsystems  
879 technology. *BMC Genomics* **9**: 75. doi:10.1186/1471-2164-9-75

880

881 Bates D, Maechler M, Bolker B, Walker S (2015). Fitting Linear Mixed-Effects Models  
882 Using lme4. *Journal of Statistical Software* **67**: 1-48.

883

884 Blasbalg TL, Hibbeln JR, Ramsden CE, Majchrzak SF, Rawlings RR (2011). Changes in  
885 consumption of omega-3 and omega-6 fatty acids in the United States during the 20th  
886 century. *Am J Clin Nutr* **93**: 950-962. doi:10.3945/ajcn.110.006643

887

888 Bligh EG, Dyer WJ (1959). A rapid method of total lipid extraction and purification. *Can J*  
889 *Biochem Physiol* **37**: 911-917. doi:10.1139/o59-099

890

891 Böcker G, Stolz, P. & Hammes, W. P. Neue (1995). Erkenntnisse zum ökosystem sauerartig  
892 und zur physiologie der sauerartigtypischen stämme  
893 *Lactobacillus sanfrancisco* und *Lactobacillus pontis*. *Getreide Mehl Brot* **49**: 370-374.

894

895 Borgstrom B, Dahlqvist A, Lundh G (1962). On the site of absorption of fat from the human  
896 small intestine. *Gut* **3**: 315-317.

897

898 Boyaval P, Corre C, Dupuis C, Roussel E (1995). Effects of Free Fatty-Acids on Propionic-  
899 Acid Bacteria. *Lait* **75**: 17-29.

900

901 Brettin T, Davis JJ, Disz T, Edwards RA, Gerdes S, Olsen GJ, Olson R, Overbeek R, Parrello  
902 B, Pusch GD, Shukla M, Thomason JA, 3rd, Stevens R, Vonstein V, Wattam AR, Xia F  
903 (2015). *RASTtk*: a modular and extensible implementation of the RAST algorithm for building  
904 custom annotation pipelines and annotating batches of genomes. *Sci Rep* **5**: 8365.  
905 doi:10.1038/srep08365

906

907 Caporaso JG, Kuczynski J, Stombaugh J, Bittinger K, Bushman FD, Costello EK, Fierer N,  
908 Pena AG, Goodrich JK, Gordon JI, Huttley GA, Kelley ST, Knights D, Koenig JE, Ley RE,  
909 Lozupone CA, McDonald D, Muegge BD, Pirrung M, Reeder J, Sevinsky JR, Turnbaugh PJ,  
910 Walters WA, Widmann J, Yatsunencko T, Zaneveld J, Knight R (2010). QIIME allows  
911 analysis of high-throughput community sequencing data. *Nat Methods* **7**: 335-336.  
912 doi:10.1038/nmeth.f.303

913

914 Caporaso JG, Lauber CL, Walters WA, Berg-Lyons D, Huntley J, Fierer N, Owens SM,  
915 Betley J, Fraser L, Bauer M, Gormley N, Gilbert JA, Smith G, Knight R (2012). Ultra-high-



- 916 throughput microbial community analysis on the Illumina HiSeq and MiSeq platforms. *ISME*  
917 *J* **6**: 1621-1624. doi:10.1038/ismej.2012.8
- 918
- 919 Carmody RN, Gerber GK, Luevano JM, Jr., Gatti DM, Somes L, Svenson KL, Turnbaugh PJ  
920 (2015). Diet dominates host genotype in shaping the murine gut microbiota. *Cell Host*  
921 *Microbe* **17**: 72-84. doi:10.1016/j.chom.2014.11.010
- 922
- 923 Cui C, Adler J (1996). Effect of mutation of potassium-efflux system, KefA, on  
924 mechanosensitive channels in the cytoplasmic membrane of Escherichia coli. *J Membr Biol*  
925 **150**: 143-152.
- 926
- 927 David LA, Materna AC, Friedman J, Campos-Baptista MI, Blackburn MC, Perrotta A,  
928 Erdman SE, Alm EJ (2014a). Host lifestyle affects human microbiota on daily timescales.  
929 *Genome Biol* **15**: R89. doi:10.1186/gb-2014-15-7-r89
- 930
- 931 David LA, Maurice CF, Carmody RN, Gootenberg DB, Button JE, Wolfe BE, Ling AV,  
932 Devlin AS, Varma Y, Fischbach MA, Biddinger SB, Dutton RJ, Turnbaugh PJ (2014b). Diet  
933 rapidly and reproducibly alters the human gut microbiome. *Nature* **505**: 559-563.  
934 doi:10.1038/nature12820
- 935
- 936 De Weirdt R, Coenen E, Vlaeminck B, Fievez V, Van den Abbeele P, Van de Wiele T (2013).  
937 A simulated mucus layer protects *Lactobacillus reuteri* from the inhibitory effects of linoleic  
938 acid. *Benef Microbes* **4**: 299-312. doi:10.3920/BM2013.0017
- 939
- 940 DeNigris SJ, Hamosh M, Kasbekar DK, Lee TC, Hamosh P (1988). Lingual and gastric  
941 lipases: species differences in the origin of prepancreatic digestive lipases and in the  
942 localization of gastric lipase. *Biochim Biophys Acta* **959**: 38-45.
- 943
- 944 DePristo MA, Banks E, Poplin R, Garimella KV, Maguire JR, Hartl C, Philippakis AA, del  
945 Angel G, Rivas MA, Hanna M, McKenna A, Fennell TJ, Kernysky AM, Sivachenko AY,  
946 Cibulskis K, Gabriel SB, Altshuler D, Daly MJ (2011). A framework for variation discovery  
947 and genotyping using next-generation DNA sequencing data. *Nat Genet* **43**: 491-498.  
948 doi:10.1038/ng.806
- 949
- 950 DeSantis TZ, Hugenholtz P, Larsen N, Rojas M, Brodie EL, Keller K, Huber T, Dalevi D, Hu  
951 P, Andersen GL (2006). Greengenes, a chimera-checked 16S rRNA gene database and  
952 workbench compatible with ARB. *Appl Environ Microbiol* **72**: 5069-5072.  
953 doi:10.1128/AEM.03006-05
- 954
- 955 Dethlefsen L, Huse S, Sogin ML, Relman DA (2008). The pervasive effects of an antibiotic  
956 on the human gut microbiota, as revealed by deep 16S rRNA sequencing. *PLoS Biol* **6**: e280.  
957 doi:10.1371/journal.pbio.0060280
- 958
- 959 Dethlefsen L, Relman DA (2011). Incomplete recovery and individualized responses of the  
960 human distal gut microbiota to repeated antibiotic perturbation. *Proc Natl Acad Sci U S A* **108**  
961 **Suppl 1**: 4554-4561. doi:10.1073/pnas.1000087107
- 962
- 963 Di Rienzi SC (2017). *Lactobacillus\_soybeanoil*. Github.  
964 [https://github.com/sdirienzi/Lactobacillus\\_soybeanoil](https://github.com/sdirienzi/Lactobacillus_soybeanoil). 3f6f164.
- 965

- 966 Duar RM, Frese SA, Lin XB, Fernando SC, Burkey TE, Tasseva G, Peterson DA, Blom J,  
967 Wenzel CQ, Szymanski CM, Walter J (2017). Experimental evaluation of host adaptation of  
968 *Lactobacillus reuteri* to different vertebrate species. *Appl Environ Microbiol*.  
969 doi:10.1128/AEM.00132-17  
970
- 971 Eckhardt TH, Skotnicka D, Kok J, Kuipers OP (2013). Transcriptional regulation of fatty acid  
972 biosynthesis in *Lactococcus lactis*. *J Bacteriol* **195**: 1081-1089. doi:10.1128/JB.02043-12  
973
- 974 El Aidy S, van den Bogert B, Kleerebezem M (2015). The small intestine microbiota,  
975 nutritional modulation and relevance for health. *Curr Opin Biotechnol* **32**: 14-20.  
976 doi:10.1016/j.copbio.2014.09.005  
977
- 978 Faith JJ, McNulty NP, Rey FE, Gordon JI (2011). Predicting a human gut microbiota's  
979 response to diet in gnotobiotic mice. *Science* **333**: 101-104. doi:10.1126/science.1206025  
980
- 981 Frese SA, Benson AK, Tannock GW, Loach DM, Kim J, Zhang M, Oh PL, Heng NC, Patil  
982 PB, Juge N, Mackenzie DA, Pearson BM, Lapidus A, Dalin E, Tice H, Goltsman E, Land M,  
983 Hauser L, Ivanova N, Kyrpides NC, Walter J (2011). The evolution of host specialization in  
984 the vertebrate gut symbiont *Lactobacillus reuteri*. *PLoS Genet* **7**: e1001314.  
985 doi:10.1371/journal.pgen.1001314  
986
- 987 Frese SA, Mackenzie DA, Peterson DA, Schmaltz R, Fangman T, Zhou Y, Zhang C, Benson  
988 AK, Cody LA, Mulholland F, Juge N, Walter J (2013). Molecular characterization of host-  
989 specific biofilm formation in a vertebrate gut symbiont. *PLoS Genet* **9**: e1004057.  
990 doi:10.1371/journal.pgen.1004057  
991
- 992 Galbraith H, Miller TB (1973a). Effect of long chain fatty acids on bacterial respiration and  
993 amino acid uptake. *J Appl Bacteriol* **36**: 659-675.  
994
- 995 Galbraith H, Miller TB (1973b). Physicochemical effects of long chain fatty acids on bacterial  
996 cells and their protoplasts. *J Appl Bacteriol* **36**: 647-658.  
997
- 998 Greenway DL, Dyke KG (1979). Mechanism of the inhibitory action of linoleic acid on the  
999 growth of *Staphylococcus aureus*. *Journal of General Microbiology* **115**: 233-245.  
1000 doi:10.1099/00221287-115-1-233  
1001
- 1002 Holmes AJ, Chew YV, Colakoglu F, Cliff JB, Klaassens E, Read MN, Solon-Biet SM,  
1003 McMahon AC, Cogger VC, Ruohonen K, Raubenheimer D, Le Couteur DG, Simpson SJ  
1004 (2017). Diet-Microbiome Interactions in Health Are Controlled by Intestinal Nitrogen Source  
1005 Constraints. *Cell Metab* **25**: 140-151. doi:10.1016/j.cmet.2016.10.021  
1006
- 1007 Jakobsson HE, Jernberg C, Andersson AF, Sjolund-Karlsson M, Jansson JK, Engstrand L  
1008 (2010). Short-term antibiotic treatment has differing long-term impacts on the human throat  
1009 and gut microbiome. *PLoS One* **5**: e9836. doi:10.1371/journal.pone.0009836  
1010
- 1011 Jenkins JK, Courtney PD (2003). *Lactobacillus* growth and membrane composition in the  
1012 presence of linoleic or conjugated linoleic acid. *Can J Microbiol* **49**: 51-57. doi:10.1139/w03-  
1013 003  
1014
- 1015 Jiang J, Bjorck L, Fonden R (1998). Production of conjugated linoleic acid by dairy starter  
1016 cultures. *J Appl Microbiol* **85**: 95-102.

- 1017  
1018 Kabara JJ, Swieczkowski DM, Conley AJ, Truant JP (1972). Fatty acids and derivatives as  
1019 antimicrobial agents. *Antimicrob Agents Chemother* **2**: 23-28.  
1020  
1021 Kankaanpaa PE, Salminen SJ, Isolauri E, Lee YK (2001). The influence of polyunsaturated  
1022 fatty acids on probiotic growth and adhesion. *FEMS Microbiol Lett* **194**: 149-153.  
1023  
1024 Kishino S, Takeuchi M, Park SB, Hirata A, Kitamura N, Kunisawa J, Kiyono H, Iwamoto R,  
1025 Isobe Y, Arita M, Arai H, Ueda K, Shima J, Takahashi S, Yokozeki K, Shimizu S, Ogawa J  
1026 (2013). Polyunsaturated fatty acid saturation by gut lactic acid bacteria affecting host lipid  
1027 composition. *Proc Natl Acad Sci U S A* **110**: 17808-17813. doi:10.1073/pnas.1312937110  
1028  
1029 Kodicek E (1945). The effect of unsaturated fatty acids on *Lactobacillus helveticus* and other  
1030 Gram-positive micro-organisms. *Biochem J* **39**: 78-85.  
1031  
1032 Kurtz S, Phillippy A, Delcher AL, Smoot M, Shumway M, Antonescu C, Salzberg SL (2004).  
1033 Versatile and open software for comparing large genomes. *Genome Biol* **5**: R12.  
1034 doi:10.1186/gb-2004-5-2-r12  
1035  
1036 Lalman JA, Bagley DM (2000). Anaerobic degradation and inhibitory effects of linoleic acid.  
1037 *Water Research* **34**: 4220-4228. doi:10.1016/S0043-1354(00)00180-9  
1038  
1039 Li H, Durbin R (2009). Fast and accurate short read alignment with Burrows-Wheeler  
1040 transform. *Bioinformatics* **25**: 1754-1760. doi:10.1093/bioinformatics/btp324  
1041  
1042 Mansbach CM, Tso P, Kuksis A (2000). *Intestinal lipid metabolism*. Kluwer  
1043 Academic/Plenum: New York.  
1044  
1045 Martinez I, Stegen JC, Maldonado-Gomez MX, Eren AM, Siba PM, Greenhill AR, Walter J  
1046 (2015). The gut microbiota of rural papua new guineans: composition, diversity patterns, and  
1047 ecological processes. *Cell Rep* **11**: 527-538. doi:10.1016/j.celrep.2015.03.049  
1048  
1049 McConnell EL, Basit AW, Murdan S (2008). Measurements of rat and mouse gastrointestinal  
1050 pH, fluid and lymphoid tissue, and implications for in-vivo experiments. *J Pharm Pharmacol*  
1051 **60**: 63-70. doi:10.1211/jpp.60.1.0008  
1052  
1053 McKenna A, Hanna M, Banks E, Sivachenko A, Cibulskis K, Kernytsky A, Garimella K,  
1054 Altshuler D, Gabriel S, Daly M, DePristo MA (2010). The Genome Analysis Toolkit: a  
1055 MapReduce framework for analyzing next-generation DNA sequencing data. *Genome Res* **20**:  
1056 1297-1303. doi:10.1101/gr.107524.110  
1057  
1058 McLaggan D, Jones MA, Gouesbet G, Levina N, Lindey S, Epstein W, Booth IR (2002).  
1059 Analysis of the *kefA2* mutation suggests that KefA is a cation-specific channel involved in  
1060 osmotic adaptation in *Escherichia coli*. *Mol Microbiol* **43**: 521-536.  
1061  
1062 McMurdie PJ, Holmes S (2013). phyloseq: an R package for reproducible interactive analysis  
1063 and graphics of microbiome census data. *PLoS One* **8**: e61217.  
1064 doi:10.1371/journal.pone.0061217  
1065  
1066 Minic Z, Marie C, Delorme C, Faurie JM, Mercier G, Ehrlich D, Renault P (2007). Control of  
1067 EpsE, the phosphoglycosyltransferase initiating exopolysaccharide synthesis in *Streptococcus*

- 1068 *thermophilus*, by EpsD tyrosine kinase. *J Bacteriol* **189**: 1351-1357. doi:10.1128/JB.01122-  
1069 06  
1070  
1071 Molin G, Jeppsson B, Johansson ML, Ahrne S, Nobaek S, Stahl M, Bengmark S (1993).  
1072 Numerical taxonomy of *Lactobacillus* spp. associated with healthy and diseased mucosa of  
1073 the human intestines. *J Appl Bacteriol* **74**: 314-323.  
1074  
1075 Nieman C (1954). Influence of trace amounts of fatty acids on the growth of microorganisms.  
1076 *Bacteriol Rev* **18**: 147-163.  
1077  
1078 Nurk S, Bankevich A, Antipov D, Gurevich AA, Korobeynikov A, Lapidus A, Prjibelski AD,  
1079 Pyskhin A, Sirotkin A, Sirotkin Y, Stepanauskas R, Clingenpeel SR, Woyke T, McLean JS,  
1080 Lasken R, Tesler G, Alekseyev MA, Pevzner PA (2013). Assembling single-cell genomes and  
1081 mini-metagenomes from chimeric MDA products. *J Comput Biol* **20**: 714-737.  
1082 doi:10.1089/cmb.2013.0084  
1083  
1084 Oh PL, Benson AK, Peterson DA, Patil PB, Moriyama EN, Roos S, Walter J (2010).  
1085 Diversification of the gut symbiont *Lactobacillus reuteri* as a result of host-driven evolution.  
1086 *ISME J* **4**: 377-387. doi:10.1038/ismej.2009.123  
1087  
1088 Oh PL, Martinez I, Sun Y, Walter J, Peterson DA, Mercer DF (2012). Characterization of the  
1089 ileal microbiota in rejecting and nonrejecting recipients of small bowel transplants. *Am J*  
1090 *Transplant* **12**: 753-762. doi:10.1111/j.1600-6143.2011.03860.x  
1091  
1092 Overbeek R, Olson R, Pusch GD, Olsen GJ, Davis JJ, Disz T, Edwards RA, Gerdes S,  
1093 Parrello B, Shukla M, Vonstein V, Wattam AR, Xia F, Stevens R (2014). The SEED and the  
1094 Rapid Annotation of microbial genomes using Subsystems Technology (RAST). *Nucleic*  
1095 *Acids Res* **42**: D206-214. doi:10.1093/nar/gkt1226  
1096  
1097 Parsons JB, Yao J, Frank MW, Jackson P, Rock CO (2012). Membrane disruption by  
1098 antimicrobial fatty acids releases low-molecular-weight proteins from *Staphylococcus aureus*.  
1099 *J Bacteriol* **194**: 5294-5304. doi:10.1128/JB.00743-12  
1100  
1101 Petersen TN, Brunak S, von Heijne G, Nielsen H (2011). SignalP 4.0: discriminating signal  
1102 peptides from transmembrane regions. *Nat Methods* **8**: 785-786. doi:10.1038/nmeth.1701  
1103  
1104 Prjibelski AD, Vasilinetc I, Bankevich A, Gurevich A, Krivosheeva T, Nurk S, Pham S,  
1105 Korobeynikov A, Lapidus A, Pevzner PA (2014). ExSPAnDer: a universal repeat resolver for  
1106 DNA fragment assembly. *Bioinformatics* **30**: i293-301. doi:10.1093/bioinformatics/btu266  
1107  
1108 Qin J, Li R, Raes J, Arumugam M, Burgdorf KS, Manichanh C, Nielsen T, Pons N, Levenez  
1109 F, Yamada T, Mende DR, Li J, Xu J, Li S, Li D, Cao J, Wang B, Liang H, Zheng H, Xie Y,  
1110 Tap J, Lepage P, Bertalan M, Batto JM, Hansen T, Le Paslier D, Linneberg A, Nielsen HB,  
1111 Pelletier E, Renault P, Sicheritz-Ponten T, Turner K, Zhu H, Yu C, Li S, Jian M, Zhou Y, Li  
1112 Y, Zhang X, Li S, Qin N, Yang H, Wang J, Brunak S, Dore J, Guarner F, Kristiansen K,  
1113 Pedersen O, Parkhill J, Weissenbach J, Meta HITC, Bork P, Ehrlich SD, Wang J (2010). A  
1114 human gut microbial gene catalogue established by metagenomic sequencing. *Nature* **464**:  
1115 59-65. doi:10.1038/nature08821  
1116

- 1117 Raychowdhury MK, Goswami R, Chakrabarti P (1985). Effect of unsaturated fatty acids in  
1118 growth inhibition of some penicillin-resistant and sensitive bacteria. *J Appl Bacteriol* **59**: 183-  
1119 188.
- 1120
- 1121 Reuter G (2001). The Lactobacillus and Bifidobacterium microflora of the human intestine:  
1122 composition and succession. *Curr Issues Intest Microbiol* **2**: 43-53.
- 1123
- 1124 Ritz C, Baty F, Streibig JC, Gerhard D (2015). Dose-Response Analysis Using R. *PLoS One*  
1125 **10**: e0146021. doi:10.1371/journal.pone.0146021
- 1126
- 1127 Robinson JT, Thorvaldsdottir H, Winckler W, Guttman M, Lander ES, Getz G, Mesirov JP  
1128 (2011). Integrative genomics viewer. *Nat Biotechnol* **29**: 24-26. doi:10.1038/nbt.1754
- 1129
- 1130 Sims IM, Frese SA, Walter J, Loach D, Wilson M, Appleyard K, Eason J, Livingston M,  
1131 Baird M, Cook G, Tannock GW (2011). Structure and functions of exopolysaccharide  
1132 produced by gut commensal *Lactobacillus reuteri* 100-23. *ISME J* **5**: 1115-1124.  
1133 doi:10.1038/ismej.2010.201
- 1134
- 1135 Sonnenburg ED, Smits SA, Tikhonov M, Higginbottom SK, Wingreen NS, Sonnenburg JL  
1136 (2016). Diet-induced extinctions in the gut microbiota compound over generations. *Nature*  
1137 **529**: 212-215. doi:10.1038/nature16504
- 1138
- 1139 Su HM, Corso TN, Nathanielsz PW, Brenna JT (1999). Linoleic acid kinetics and conversion  
1140 to arachidonic acid in the pregnant and fetal baboon. *J Lipid Res* **40**: 1304-1312.
- 1141
- 1142 Team RC (2016). R: A language and environment for statistical computing. R Foundation for  
1143 Statistical Computing: Vienna, Austria.
- 1144
- 1145 Thorvaldsdottir H, Robinson JT, Mesirov JP (2013). Integrative Genomics Viewer (IGV):  
1146 high-performance genomics data visualization and exploration. *Brief Bioinform* **14**: 178-192.  
1147 doi:10.1093/bib/bbs017
- 1148
- 1149 Turnbaugh PJ, Backhed F, Fulton L, Gordon JI (2008). Diet-induced obesity is linked to  
1150 marked but reversible alterations in the mouse distal gut microbiome. *Cell Host Microbe* **3**:  
1151 213-223. doi:10.1016/j.chom.2008.02.015
- 1152
- 1153 Turnbaugh PJ, Ridaura VK, Faith JJ, Rey FE, Knight R, Gordon JI (2009). The effect of diet  
1154 on the human gut microbiome: a metagenomic analysis in humanized gnotobiotic mice. *Sci*  
1155 *Transl Med* **1**: 6ra14. doi:10.1126/scitranslmed.3000322
- 1156
- 1157 Van der Auwera GA, Carneiro MO, Hartl C, Poplin R, Del Angel G, Levy-Moonshine A,  
1158 Jordan T, Shakir K, Roazen D, Thibault J, Banks E, Garimella KV, Altshuler D, Gabriel S,  
1159 DePristo MA (2013). From FastQ data to high confidence variant calls: the Genome Analysis  
1160 Toolkit best practices pipeline. *Curr Protoc Bioinformatics* **43**: 11 10 11-33.  
1161 doi:10.1002/0471250953.bi1110s43
- 1162
- 1163 van Pijkeren JP, Britton RA (2012). High efficiency recombineering in lactic acid bacteria.  
1164 *Nucleic Acids Res* **40**: e76. doi:10.1093/nar/gks147
- 1165
- 1166 Vollmer W, Joris B, Charlier P, Foster S (2008). Bacterial peptidoglycan (murein) hydrolases.  
1167 *FEMS Microbiol Rev* **32**: 259-286. doi:10.1111/j.1574-6976.2007.00099.x



1168  
1169 Wall T, Bath K, Britton RA, Jonsson H, Versalovic J, Roos S (2007). The early response to  
1170 acid shock in *Lactobacillus reuteri* involves the ClpL chaperone and a putative cell wall-  
1171 altering esterase. *Appl Environ Microbiol* **73**: 3924-3935. doi:10.1128/AEM.01502-06  
1172  
1173 Walsh MC, Gardiner GE, Hart OM, Lawlor PG, Daly M, Lynch B, Richert BT, Radcliffe S,  
1174 Giblin L, Hill C, Fitzgerald GF, Stanton C, Ross P (2008). Predominance of a bacteriocin-  
1175 producing *Lactobacillus salivarius* component of a five-strain probiotic in the porcine ileum  
1176 and effects on host immune phenotype. *FEMS microbiology ecology* **64**: 317-327.  
1177 doi:10.1111/j.1574-6941.2008.00454.x  
1178  
1179 Walter J, Loach DM, Alqumber M, Rockel C, Hermann C, Pfitzenmaier M, Tannock GW  
1180 (2007). D-alanyl ester depletion of teichoic acids in *Lactobacillus reuteri* 100-23 results in  
1181 impaired colonization of the mouse gastrointestinal tract. *Environ Microbiol* **9**: 1750-1760.  
1182 doi:10.1111/j.1462-2920.2007.01292.x  
1183  
1184 Walter J (2008). Ecological role of lactobacilli in the gastrointestinal tract: implications for  
1185 fundamental and biomedical research. *Appl Environ Microbiol* **74**: 4985-4996.  
1186 doi:10.1128/AEM.00753-08  
1187  
1188 Walter J, Britton RA, Roos S (2011). Host-microbial symbiosis in the vertebrate  
1189 gastrointestinal tract and the *Lactobacillus reuteri* paradigm. *Proc Natl Acad Sci U S A* **108**  
1190 **Suppl 1**: 4645-4652. doi:10.1073/pnas.1000099107  
1191  
1192 Webb AJ, Karatsa-Dodgson M, Grundling A (2009). Two-enzyme systems for glycolipid and  
1193 polyglycerolphosphate lipoteichoic acid synthesis in *Listeria monocytogenes*. *Mol Microbiol*  
1194 **74**: 299-314. doi:10.1111/j.1365-2958.2009.06829.x  
1195  
1196 Yachdav G, Kloppmann E, Kajan L, Hecht M, Goldberg T, Hamp T, Honigschmid P,  
1197 Schafferhans A, Roos M, Bernhofer M, Richter L, Ashkenazy H, Punta M, Schlessinger A,  
1198 Bromberg Y, Schneider R, Vriend G, Sander C, Ben-Tal N, Rost B (2014). PredictProtein--an  
1199 open resource for online prediction of protein structural and functional features. *Nucleic Acids*  
1200 *Res* **42**: W337-343. doi:10.1093/nar/gku366  
1201  
1202 Zhang C, Zhang M, Pang X, Zhao Y, Wang L, Zhao L (2012). Structural resilience of the gut  
1203 microbiota in adult mice under high-fat dietary perturbations. *ISME J* **6**: 1848-1857.  
1204 doi:10.1038/ismej.2012.27  
1205  
1206 Zheng CJ, Yoo JS, Lee TG, Cho HY, Kim YH, Kim WG (2005). Fatty acid synthesis is a  
1207 target for antibacterial activity of unsaturated fatty acids. *FEBS Lett* **579**: 5157-5162.  
1208 doi:10.1016/j.febslet.2005.08.028  
1209  
1210  
1211

1212 **Figure 1. *L. reuteri* is inhibited by 18:2.**

1213 **A)** Disc diffusion of *L. reuteri* plated with the FAs of SBO. FAs were dissolved in DMSO to  
1214 a concentration of 50 mg/ml, except for palmitic acid (16:0), which was dissolved to a  
1215 concentration of 5 mg/ml. Clearings around the discs indicate growth inhibition. **B)** Dose  
1216 response curve of 18:2 with *L. reuteri*. IC<sub>50</sub> is estimated at 20 µg/ml ( $p < 0.001$ ). See also  
1217 **Figure 1 – Figure supplement 1.**

1218

1219 **Figure 2. Variation in natural *L. reuteri* strains' response to 18:2.**

1220 Fourteen rodent (RD), six porcine (PR), nine human (HM), seven poultry (PL), and four  
1221 sourdough (SD) strains were tested. Standard deviations in normalized cell density in 18:2 are  
1222 shown. Higher values indicate cellular density achieved in liquid culture is uninhibited by  
1223 18:2. Significance was determined by a Kruskal-Wallis test; mean in non-rodents = 0.45,  
1224 mean in rodents = 0.22. See also **Figure 2 – Figure supplement 1** and **Supplementary File**  
1225 **1.**

1226

1227 **Figure 3. *In vitro* evolution of 18:2 resistance in lactobacilli.**

1228 **A)** Five cultures of *L. reuteri* strain LR0 and five cultures of *L. johnsonii* strain LJ0 were  
1229 passaged twice daily via a 100x dilution in liquid culture supplemented with 18:2. The 18:2  
1230 concentration was increased each week by 1 mg/ml from 5 to 10 mg/ml over a total of 6  
1231 weeks. **B)** Disc diffusion (as in **Figure 1**) of *L. reuteri* and *L. johnsonii* starting strains LR0  
1232 and LJ0 and evolved populations LR2 and LJ4. Tested compounds: A. SBO, B. Saline, C.  
1233 DMSO, D. 16:0, E. 18:0, F. 18:1, G. 18:2, H. 18:3. Growth curve of **C)** *L. reuteri* starting  
1234 strain LR0, evolved isolate LR2-1 (from population LR2), **D)** *L. johnsonii* starting strain LJ0,  
1235 and evolved isolate LJ41072 (from population LJ4) in liquid medium with and without 18:2.  
1236 Each point represents triplicate cultures and standard deviations are shown. See also **Figure 3**  
1237 **– Figure supplement 1** and **2** and **Supplementary Files 2 to 6.**

1239

1240 **Figure 4. *L. reuteri* and *L. johnsonii* can survive 18:2 *in vivo* without 18:2 resistance.**

1241 **A)** Schematic of the SBO diet experiment. After 10 weeks on either the LF or HF SBO diet,  
1242 24 mice on each diet were gavaged with 18:2 or saline (n = 12 for each). 1.5 hours post  
1243 gavage, mice were sacrificed, jejunal contents collected and split into two. One aliquot was  
1244 PMA treated (live-only cells) and the other was not (live and dead cells, total). 16S rRNA  
1245 gene sequencing was performed on both aliquots. Sample size values shown on the right of  
1246 the figure panel reflect samples passing rarefaction. **B)** Weighted UniFrac distances between  
1247 the live-only and total aliquots for each mouse sample. Significance values were determined  
1248 using Kruskal-Wallis tests. For LF samples, mean in saline gavage group = 0.03, mean in  
1249 18:2 gavage group = 0.11; for HF samples, mean in saline gavage group = 0.04, mean in 18:2  
1250 gavage group = 0.19. **C)** Relative abundance of *L. reuteri* OTU 692154 and **D)** *L. johnsonii*  
1251 OTU 592160 in the total cell and 18:2 gavage live-only aliquots. For the total cell aliquots,  
1252 post rarefaction, n = 22 for LF diet; n = 24 for HF diet. For the 18:2 gavage live-only aliquots,  
1253 post rarefaction, n = 11 for LF diet; n = 10 for HF diet. Dark lines indicate the 50% quartile,  
1254 and the two thinner lines show the 25% and 75% quartiles. Mean values for *L. reuteri*: total-  
1255 LF diet = 0.007; total-HF diet = 0.012; 18:2-live-only-LF = 0.015; 18:2-live-only-HF = 0.061.  
1256 Mean values for *L. johnsonii*: total-LF diet = 0.140; total-HF diet = 0.121; 18:2-live-only-LF  
1257 = 0.302; 18:2-live-only-HF = 0.404. Significance values were determined using an ANOVA  
1258 on a linear mixed model to include cage effects. For comparisons within diets, between total  
1259 and live-only aliquots, similar results were obtained if only 18:2 gavaged animals were  
1260 considered in the total aliquot. As well, similar results were obtained using Kruskal-Wallis  
1261 tests. **E)** Normalized cell density in 18:2 of lactobacilli isolated from mice on the low or high  
1262 SBO diets. A value of one means cells were not inhibited by 18:2. For reference, the evolved  
1263 strain LJ41072, which has enhanced resistance to 18:2 (Figure 3D), gives a value of 0.6.  
1264 Black lines indicate the mean and standard deviations of the entire set of colonies. The



1265 colored lines show the standard deviations for replicate tested colonies. For *L. reuteri*, we  
1266 excluded 7/120 isolates that failed grow in medium lacking 18:2 and tested 113 isolates  
1267 derived from 15 mice housed in 8 of 12 cages (5 HF diet cages and 3 LF diet cages; note that  
1268 *L. reuteri* was not detected by 16S rRNA gene amplicon sequencing in several of the cages).  
1269 For *L. johnsonii*, we excluded 33/192 isolates that failed grow in medium lacking 18:2 and  
1270 tested 159 isolates from 22 mice in all 12 cages. A single *L. reuteri* replicate gave a  
1271 normalized cell density in 18:2 above 1.0. Significance values were determined by Kruskal-  
1272 Wallis tests: for *L. reuteri*  $p = 0.039$ , mean in LF group = 0.04, mean in HF group = 0.09; for  
1273 *L. johnsonii*  $p = 1.9 \times 10^{-4}$ , mean in LF group = 0.15, mean in HF group = 0.08. See also  
1274 **Figure 4 – Figure supplements 1 to 4 and Figure 4 – Source data 1.**

1275

1276

1277 **Tables**

1278 **Table 1. High frequency mutations in *L. reuteri* in vitro evolved populations.**

| Gene                             | Function                    | LR1    | LR2    | LR3    | LR4   | LR5    |
|----------------------------------|-----------------------------|--------|--------|--------|-------|--------|
| <i>FabT</i> (5)*                 | Fatty acid biosynthesis     | 71% NS | 99% IT | 98% NS | 76% U | 81% NS |
| <i>EpsD</i> (2)*                 | Exopolysaccharide synthesis | 76% FS |        | 99% NS |       |        |
| <i>EpsC</i>                      | Exopolysaccharide synthesis |        |        |        |       | 86% NS |
| FIG005986 HD family hydrolase    | Hydrolase                   |        |        |        |       | 77% NS |
| FIG00745602 hypothetical protein | Transmembrane protein       |        | 99% PS |        |       |        |
| Ammonium transporter             | Ammonium transporter        |        |        | 67% U  |       |        |

1279

1280 \*(#) indicates number of distinct mutations across the populations. The percent of the  
 1281 population with a mutation in the named gene is shown. Variants at frequency greater than  
 1282 60% are shown. NS = nonsynonymous; IT = internal truncation; U = intergenic upstream; PS  
 1283 = premature stop; FS = frameshift. See also **Figure 3 – Figure supplement 1 and 2 and**  
 1284 **Supplementary Files 3 and 5.**

1285

1286 **Table 2. High frequency mutations in *L. johnsonii* in vitro evolved populations.**

| Gene                                         | Function                                   | LJ2     | LJ3     | LJ4     | LJ5    |
|----------------------------------------------|--------------------------------------------|---------|---------|---------|--------|
| Esterase/lipase                              | Intracellular esterase/lipase              | 88% NS  |         |         |        |
| Putative membrane protein (2)*               | Transmembrane protein                      | 100% NS | 100% FS | 100% NS |        |
| Lipase/esterase                              | Intracellular esterase/lipase              |         | 99% NS  |         | 93% NS |
| <i>KefA</i>                                  | Small-conductance mechanosensitive channel |         |         | 62% DEL |        |
| <i>LafA</i>                                  | Glycosyltransferase                        |         | 100% NS |         |        |
| <i>NrdI</i> (2)*                             | Ribonucleotide reduction                   | 100% NS |         | 100% NS |        |
| <i>TetR</i> family transcriptional regulator | Membrane structure                         |         |         | >60% PS |        |

1287

1288 Data are presented as in **Table 1**. NS = nonsynonymous; FS = frameshift; DEL = in-frame

1289 deletion; PS = premature stop. The insertion in *TetR* in LR4 was not properly called by

1290 GATK; the frequency is estimated. See also **Figure 3 – Figure supplement 1 and 2 and**

1291 **Supplementary Files 4 and 6.**

1292

1293

1294 **Table 3. Nonsynonymous mutations in genes with known function in LRHF.**

| Gene                                                                      | Functional group       | Mutation type |
|---------------------------------------------------------------------------|------------------------|---------------|
| helicase                                                                  | DNA metabolism         | NS            |
| N-acetyl-L,L-diaminopimelate aminotransferase                             | energy metabolism      | NS            |
| Mrr restriction system protein                                            | DNA metabolism         | NS            |
| Putative NADPH-quinone reductase                                          | energy metabolism      | NS            |
| Accessory gene regulator C (sensor histidine kinase)                      | environmental response | NS            |
| Transcriptional regulator, XRE family                                     | environmental response | FS            |
| ATPase component BioM of energizing module of biotin ECF transporter      | energy metabolism      | NS            |
| CRISPR-associated protein, Csn1 family                                    | DNA metabolism         | NS            |
| Transcriptional regulator, XRE family                                     | environmental response | NS            |
| Exodeoxyribonuclease VII small subunit                                    | DNA metabolism         | NS            |
| Type I restriction-modification system, specificity subunit S             | DNA metabolism         | NS            |
| ABC1 family protein                                                       | energy metabolism      | NS            |
| Protein serine/threonine phosphatase PrpC, regulation of stationary phase | energy metabolism      | FS            |
| Nucleotide sugar synthetase-like protein                                  | DNA metabolism         | NS            |
| DNA repair protein RecN                                                   | DNA metabolism         | NS            |
| ABC transporter substrate-binding protein                                 | energy metabolism      | FS            |
| Fructosyltransferase Ftf                                                  | membrane               | PS            |
| Oxidoreductase                                                            | energy metabolism      | NS            |
| Ribonuclease M5                                                           | DNA metabolism         | NS            |
| Zinc-containing alcohol dehydrogenase; quinone oxidoreductase             | energy metabolism      | FS            |
| DinG family ATP-dependent helicase YoaA                                   | DNA metabolism         | NS            |
| Aromatic amino acid aminotransferase gamma                                | energy metabolism      | NS            |

1295

1296 Mutations: NS = nonsynonymous; FS = frameshift; PS = premature stop. See also **Figure 4 –**

1297 **Figure supplement 5 and Supplementary Files 3 and 5.**

1298

1299

1300 **Figure Supplement Legends**

1301 **Figure 1 – Figure supplement 1. *L. reuteri* is inhibited by the hydrolysis products of**  
1302 **SBO.** Disc diffusion assay of *L. reuteri* plated with each SBO FA and glycerol mixed to  
1303 match their composition in soybean oil (FA mix + glycerol). Disc diffusions with 16:0, 18:2,  
1304 total soybean oil, DMSO and glycerol, and a mix of only the FAs in SBO (FA mix) are shown  
1305 as controls. Note that the size of a zone of inhibition reflects both the toxicity of the  
1306 compound as well as the migration of the compound off the disc: the saturated FAs in the FA  
1307 mix deter migration whereas the unsaturated FAs move well off the disc.

1308

1309 **Figure 2 – Figure supplement 1. *L. reuteri* resistance to 18:2 is not related to site of**  
1310 **isolation in humans nor phylogenetic clade.** Normalized cell density in 18:2 of human  
1311 derived *L. reuteri* by **A)** body site and **B)** all strains by clade.

1312

1313 **Figure 3 – Figure supplement 1. *Lactobacillus* strains, populations, and isolates involved**  
1314 **in the *in vitro* evolution experiment.** Mouse derived strains LR0 (*L. reuteri*) and LJ0 (*L.*  
1315 *johnsonii*) were inoculated into 5 cultures each. These cultures were passaged twice daily in  
1316 media containing 18:2 for six weeks. The resulting populations for LR0 were LR1 to LR5 and  
1317 for LJ0, LJ1 to LJ5. From population LR2, isolate LR2-1 was further analyzed as was isolate  
1318 LJ41072 from LJ4.

1319

1320 **Figure 3 – Figure supplement 2. *Lactobacillus* populations passaged in 18:2 have**  
1321 **increased resistance to 18:2. A)** Disc diffusions for all *L. reuteri* and *L. johnsonii*  
1322 populations and their ancestor strains with 18:2 and 18:3. **B)** Individual *L. reuteri* fatty acid  
1323 mutations in FabT and the hydrolase gene created in the fatty acid sensitive strain PTA 6475.

1324

1325 **Figure 4 – Figure supplement 1. A)** 18:2 in the plasma of mice post gavage with 18:2. A  
1326 single mouse per time point is shown. Amount of **B)** 18:2 and **C)** 18:3 in the plasma of  
1327 Jackson F2 and Taconic mice 1.5 hours post gavage with 18:2, 18:3, or PBS. N = 6 to 13 for  
1328 each group. Points represent normalized fatty acid amounts and boxplots show covariate  
1329 adjustments from the least squares means estimates derived from a linear mixed model (see  
1330 Material and methods). The p values indicate the significance of the amount of 18:2 (panel  
1331 B)/18:3 (panel C) in the plasma of mice gavaged with 18:2/18:3 versus those in the other  
1332 gavage groups. P values were determined using a t-test on the least squares means estimates  
1333 data. In **B)**, for Jackson F2 mice, mean in 18:2 group = 98.8, mean for other gavages = 65.4,  
1334 and 95% CI = (-60.96, -5.93); for Taconic mice, mean in 18:2 group = 130.8, mean for other  
1335 gavages = 97.5, and 95% CI = (-49.81, -16.96). In **C)**, for Jackson F2 mice, mean in 18:3  
1336 group = 29.3, mean for other gavages = 1.4, and 95% CI = (-33.02, -22.68); for Taconic mice,  
1337 mean in 18:3 group = 35.4, mean for other gavages = 4.8, and 95% CI = (-35.90, -25.36).  
1338

1339 **Figure 4 – Figure supplement 2. Lactobacilli survive acute and chronic 18:2 exposure in**  
1340 **murine.** **A)** Principal coordinate analysis on the weighted UniFrac distance metric for PMA  
1341 treated (live-only) jejunal contents for mice on the LF or **B)** HF diet. Points are colored by  
1342 gavage. Ellipses show a t-distribution fit to the data to provide an estimation of the full  
1343 distribution if further samples were available. The percent variance explained and significance  
1344 of the clusters as determined by performing adonis are shown. Post rarefaction, for the LF  
1345 diet, n = 12 for the saline gavage and n = 11 for the 18:2 gavage; for the HF diet, n = 11 for  
1346 the saline gavage and n = 10 for the 18:2 gavage. **C)** Relative abundance of *L. reuteri* OTU  
1347 692154 in total cell population by cage (post rarefaction, n = 22 for LF diet; n = 24 for HF  
1348 diet). **D)** OTUs differentiating the 18:2 and saline gavage in live-only aliquots for mice on the  
1349 HF diet (FDR < 0.10). Genus is shown unless otherwise noted (f = family). **E)** qPCR analysis  
1350 of the change in lactobacilli 16S rRNA copy numbers between live-only (PMA) and total

1351 (non-PMA) aliquots normalized by that change for Eubacteria. Significance values were  
1352 determined by two sample, two-tailed t-tests: for the LF diet group  $p = 0.2181$ , mean in saline  
1353 group = 1.11, mean in 18:2 group = 2.38, 95% CI = (-0.88, 3.42); for the HF diet group  $p =$   
1354 0.5381, mean in saline group = 0.91, mean in 18:2 group = 0.78, 95% CI = (-0.32, 0.58). Dark  
1355 lines indicate the 50% quartile, and the two thinner lines show the 25% and 75% quartiles.  
1356

1357 **Figure 4 – Figure supplement 3. Lactobacilli survive chronic 18:2 exposure *in murine*.**

1358 **A)** Relative abundance of *L. reuteri* OTU 692154 and **B)** *L. johnsonii* OTU 592160 in  
1359 Taconic mouse jejunum after 10 weeks on SBO diets (post rarefaction,  $n = 9$  for LF diet;  $n = 10$   
1360 for HF diet). **C)** Relative abundance of *L. johnsonii* OTU 592160, and **D)** *L. reuteri* OTU  
1361 692154 F2 Jackson mouse jejunum after 10 weeks on SBO diets (post rarefaction,  $n = 11$  for LF  
1362 diet;  $n = 13$  for HF diet). **E)** Relative abundance on unrarefied 16S rRNA sequence counts  
1363 from fecal pellets collected over the course of the diet experiment for F2 Jackson mice. Only  
1364 samples with at least 10,000 total sequences were used. Number of fecal pellets tested at each  
1365 time point per diet is at least 9, whereby 5 cages were sampled at each time point for the HF  
1366 diet and 4 cages for the LF diet. Dark lines indicate the 50% quartile, and the two thinner lines  
1367 show the 25% and 75% quartiles.

1368

1369 **Figure 4 – Figure supplement 4. The 18:2 resistance of lactobacilli isolates *in vitro* does**

1370 **not relate to ability to survive acute 18:2 exposure *in murine*.** **A)** Normalized cell density  
1371 in 18:2 as in Figure 4E colored by cage. Lack of correlation between normalized cell density  
1372 in 18:2 and normalized abundance in 18:2 mice for the *L. reuteri* isolated from the **B)** LF and  
1373 **C)** HF diet mice.

1374

1375 **Figure 4 – Figure supplement 5. An HF diet isolated *L. reuteri* is resistant to 18:2.**

1376 Growth curve of *L. reuteri* isolates from mice on the LF SBO diet (LR0) and from the HF

1377 SBO diet (LRHF). Both strains were isolated from the same cohort of mice on the SBO diets  
1378 for six weeks. Data points are shown in triplicate technical replication with standard  
1379 deviations.

1380

### 1381 **Source data and Supplementary Files**

1382

#### 1383 **Figure 3 – Source data 1. Oligos used to generate *L. reuteri* mutants**

1384

#### 1385 **Figure 4 – Source data 1. SBO mouse diets.**

1386

1387 **Supplementary File 1. *L. reuteri* strains isolated from various hosts.** Host, strain name,  
1388 country of origin, clade, and site of isolation on the human body (if applicable) are given.

1389

#### 1390 **Supplementary File 2. Lactobacilli *in vitro* population sequencing.** Tab

1391 “SequencingCoverage” gives information on the sequencing run, barcode, number of  
1392 sequences obtained, and estimated genomic coverage. Tab “AncestorGenomes” gives  
1393 information on the assembled LJ0 and LR0 genomes.

1394

#### 1395 **Supplementary File 3. Filtered and unfiltered mutations in the *L. reuteri in vitro***

1396 **population and HF diet isolate sequencing data.** Tab “Key” describes the information in  
1397 the subsequent tabs. Tab “All” shows all variants passing filtering by GATK. Tab “Filtered”  
1398 shows variants filtered to exclude alleles in genes annotated with “mobile element protein”,  
1399 “transposase”, “phage”, or “RNA”, alleles at less than 10% frequency, and alleles at  
1400 frequency greater than 0.5 in the aligned ancestor reads against the reference genome. Tab  
1401 “Handchecked” shows variants passing previous filtering and confirmed manually in IGV.

1402 For *L. reuteri* two additional tabs are included: “LRHF only” shows variants only found in the



1403 *L. reuteri* isolate from a mouse on the HF SBO diet. “Populations only” tab shows variants  
1404 only found in the *in vitro* evolution assay. Genomic details are taken from the RAST  
1405 annotation of the ancestor genome. Other columns are taken from the GATK vcf file. For  
1406 allele variants falling in intergenic regions, the surrounding genes are listed in HitGene and  
1407 HitChrom, HitStrand, HitStart, HitEnd, HitDNA, and HitProtein are listed as “NA”.

1408

1409 **Supplementary File 4. Filtered and unfiltered mutations in the *L. johnsonii in vitro***  
1410 **population sequencing data.** Tabs and details are the same as for **Supplementary File 3.**

1411

1412 **Supplementary File 5. RAST annotation for the assembled LR0 genome.**

1413

1414 **Supplementary File 6. RAST annotation for the assembled LJ0 genome.**

1415

Figure 1

A

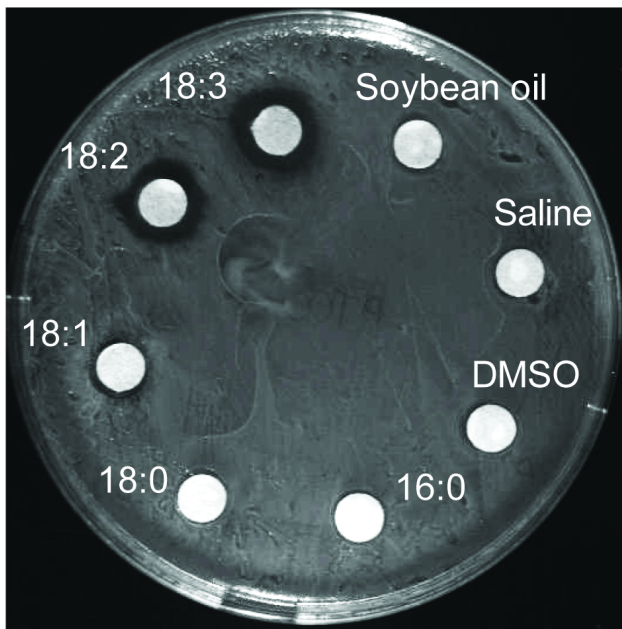

B

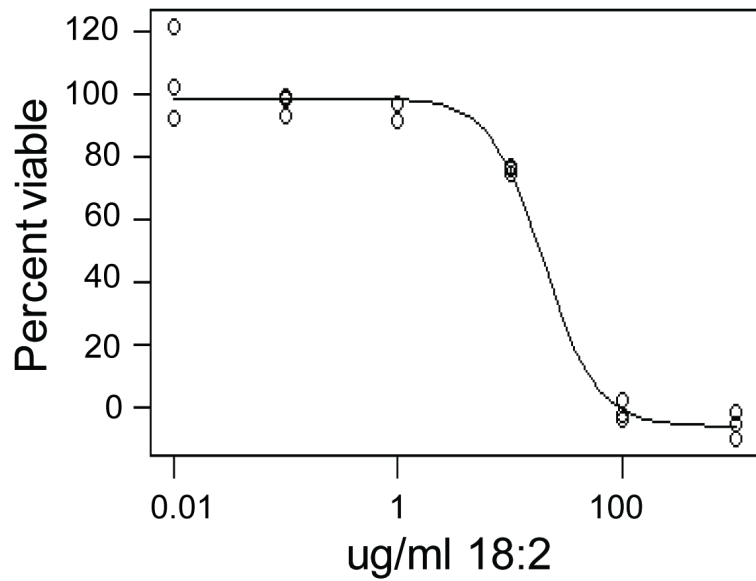

Figure 2

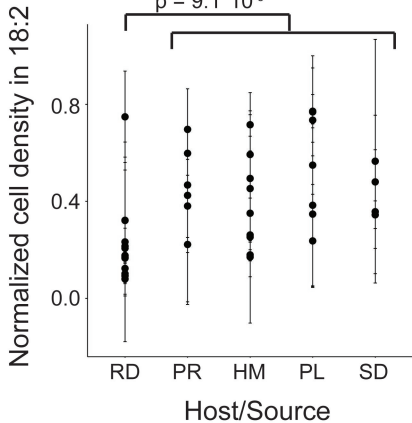

Figure 3

A

Week 18:2

1 5 mg/ml  
2 6 mg/ml

●  
●  
●  
●

6 10 mg/ml

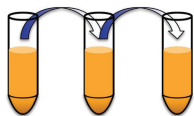

Twice daily dilution  
on 5 cultures

B

*L. reuteri*

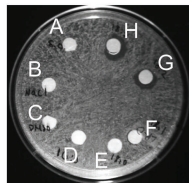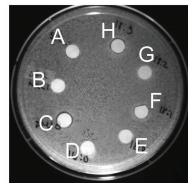

*L. johnsonii*

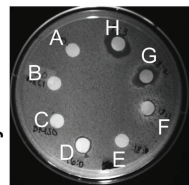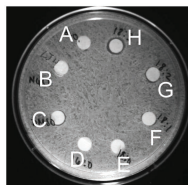

Starting strains

Evolved strains

C

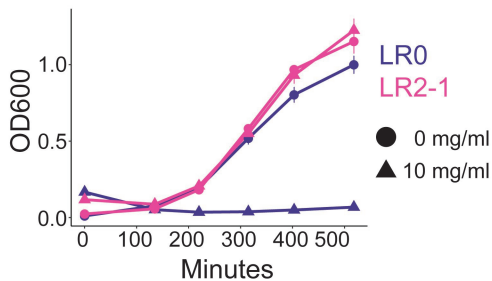

D

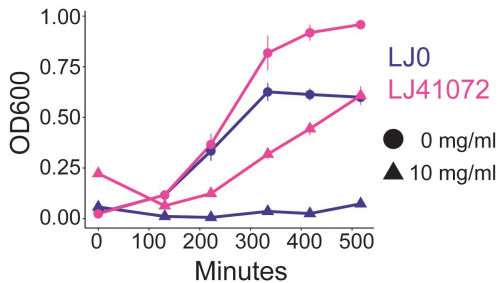

Figure 4

A

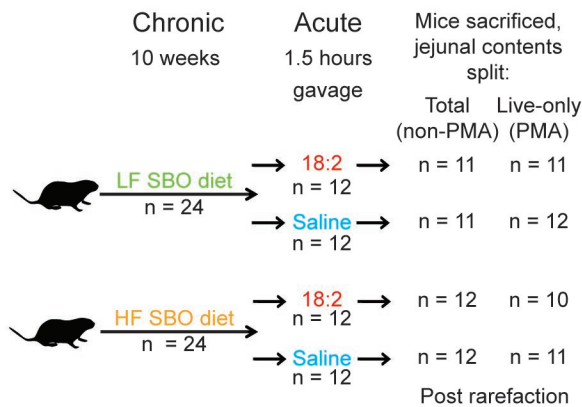

B

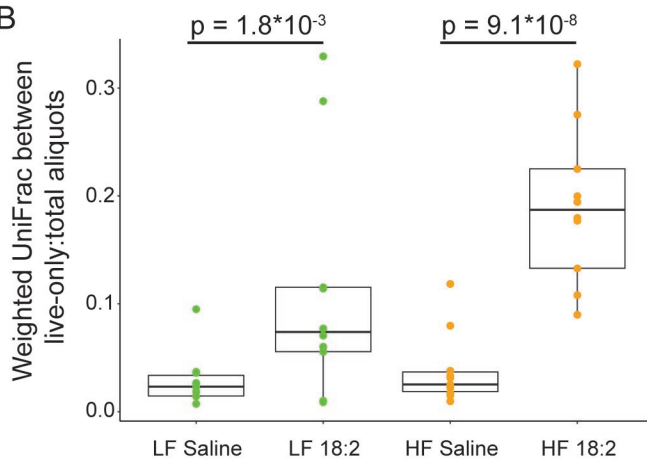

C

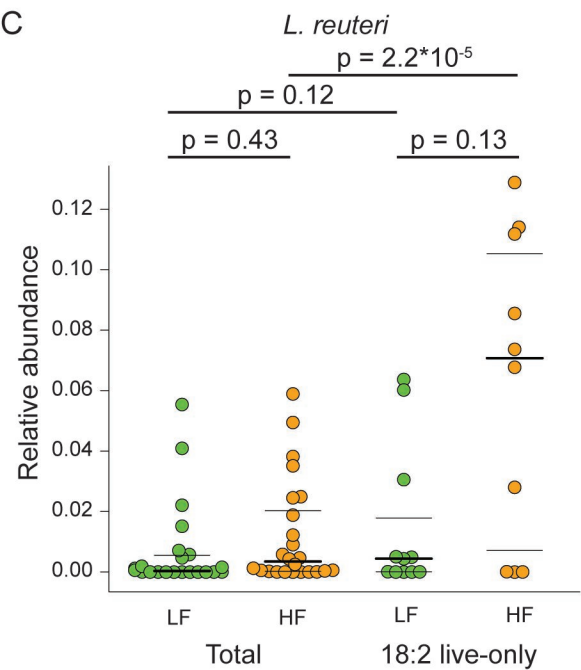

D

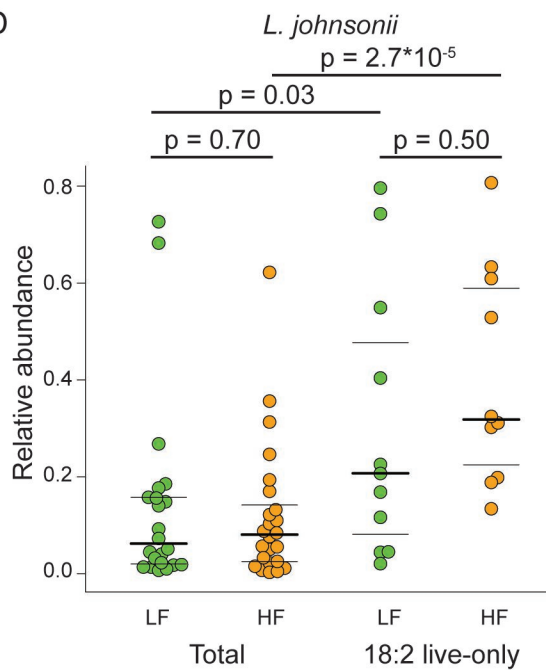

E

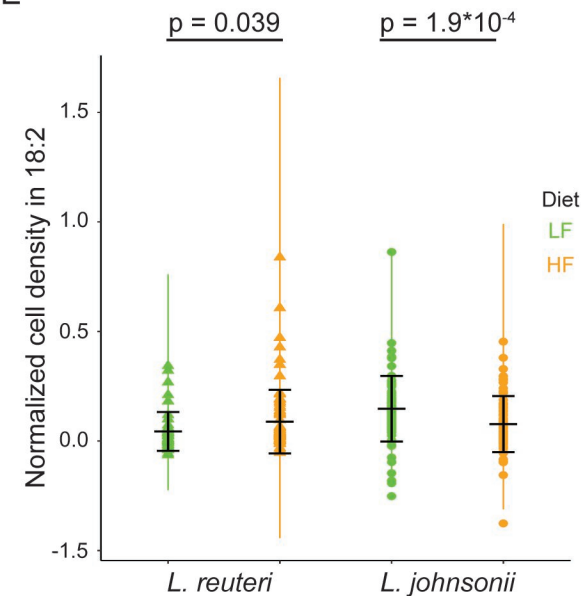

Figure 1 – Figure supplement 1

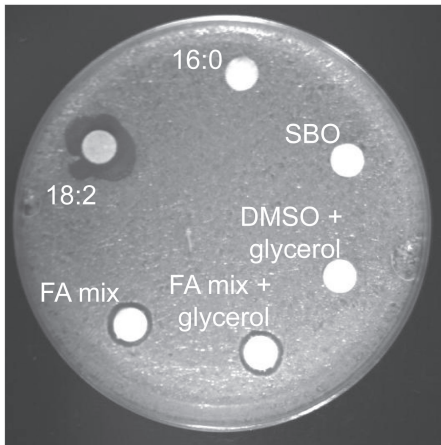

Figure 2 – Figure supplement 1

A

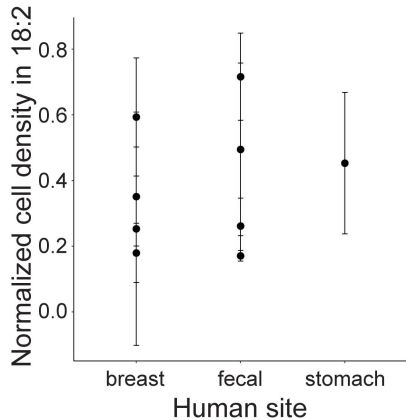

B

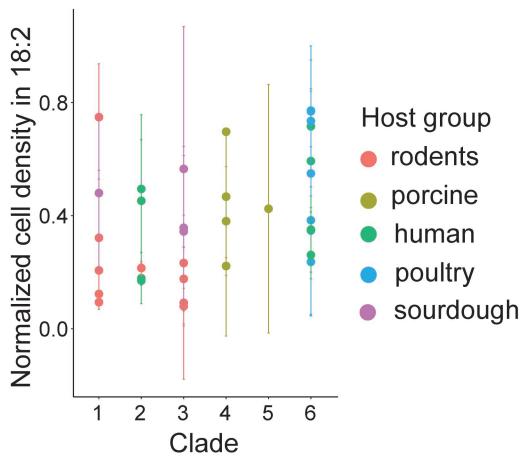

Figure 3 – Figure supplement 1

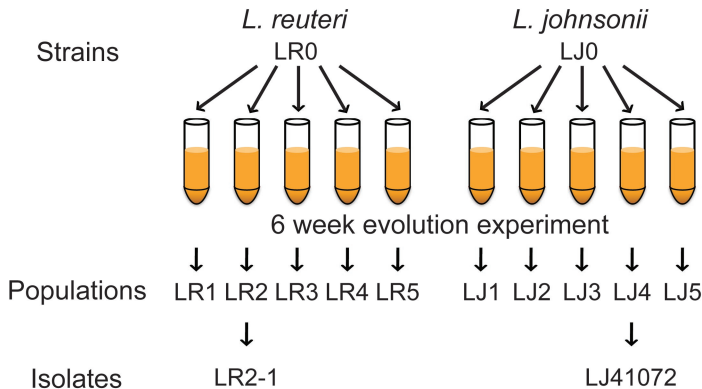



Figure 3 – Figure supplement 2

A

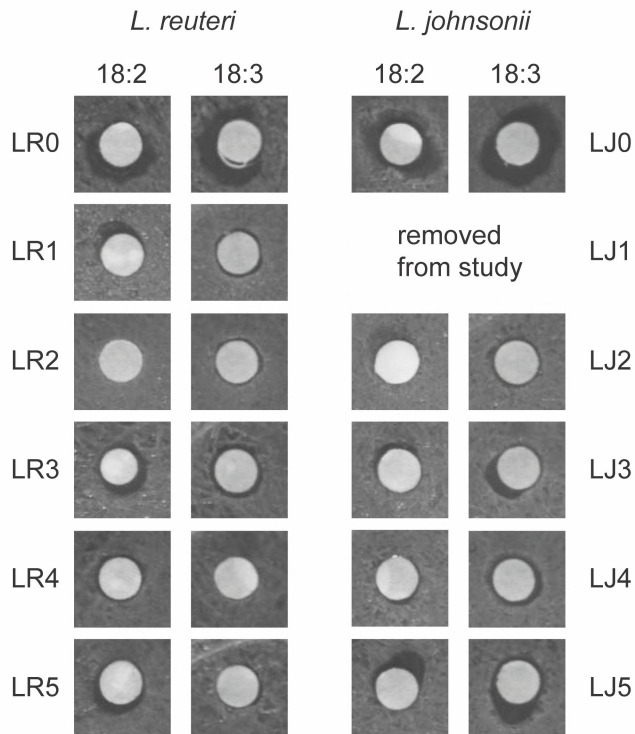

B

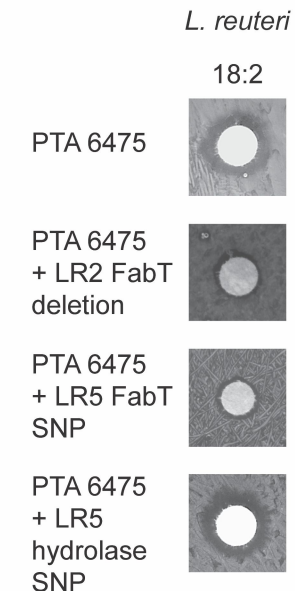

Figure 4 – Figure supplement 1

A

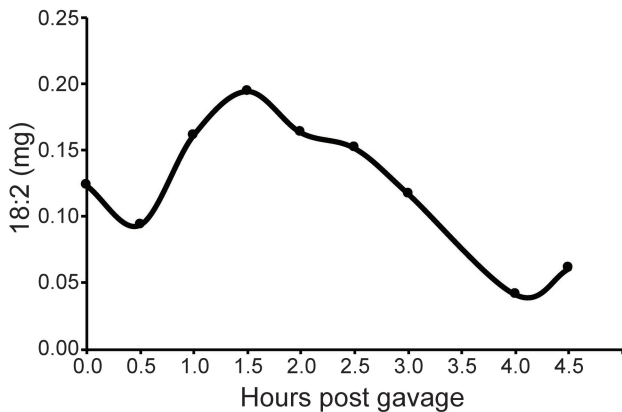

B

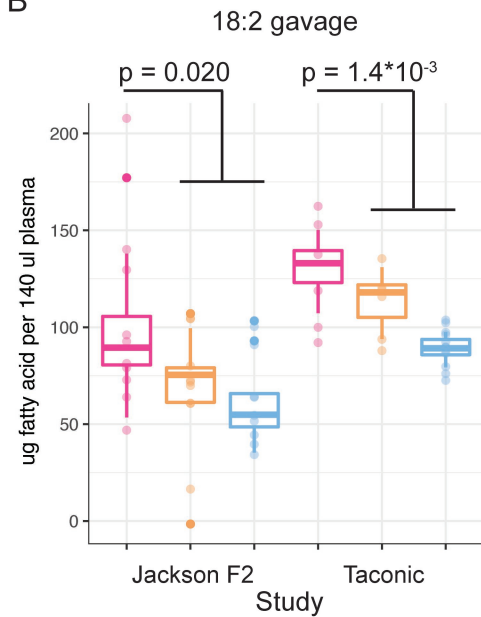

C

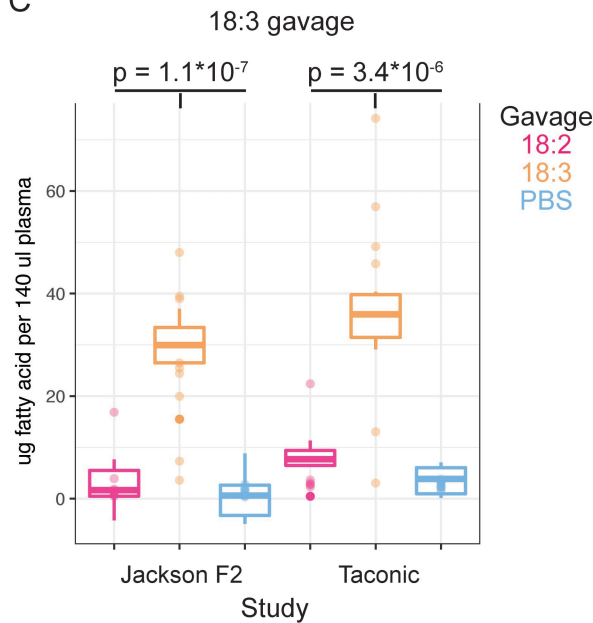

Figure 4 – Figure supplement 2

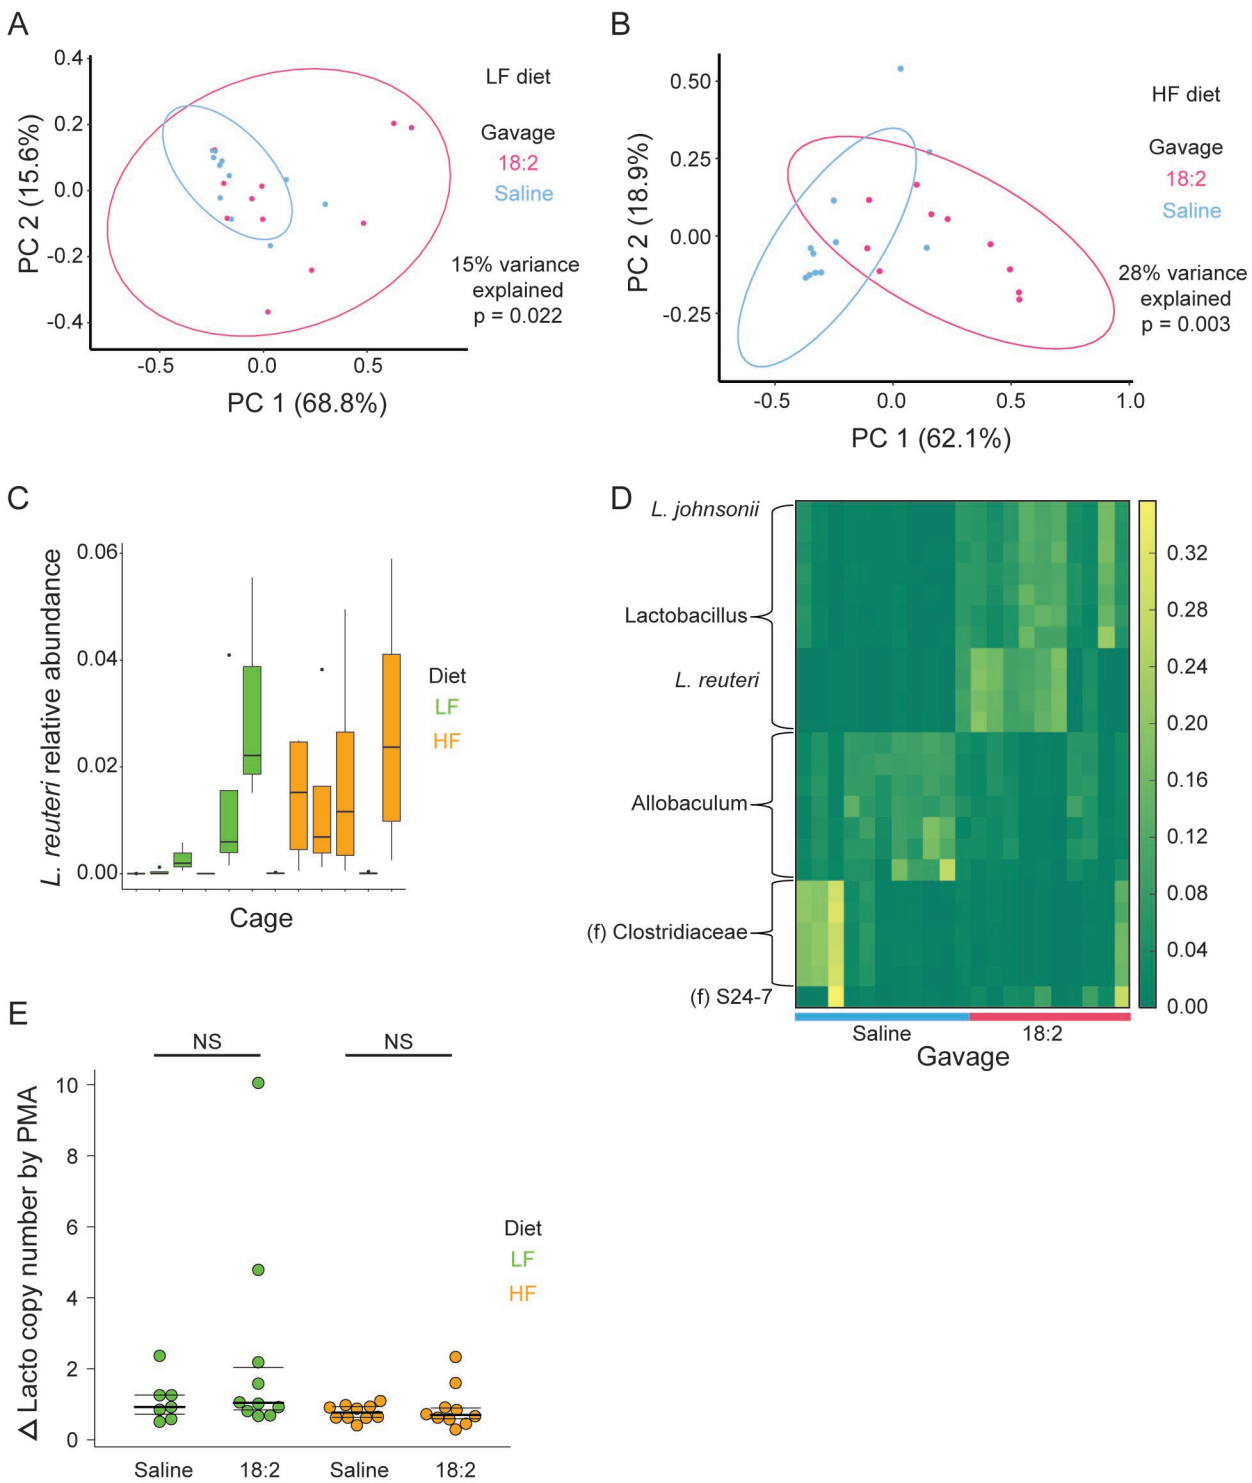

Figure 4 – Figure supplement 3

A

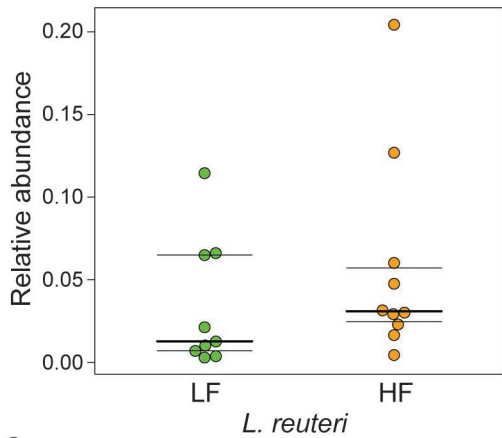

B

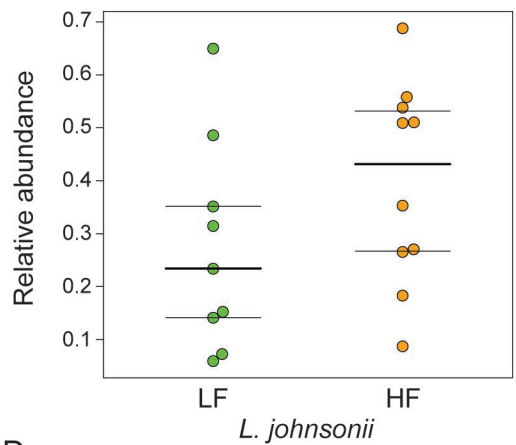

C

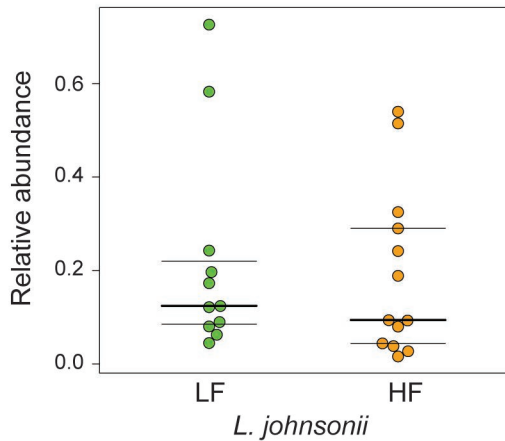

D

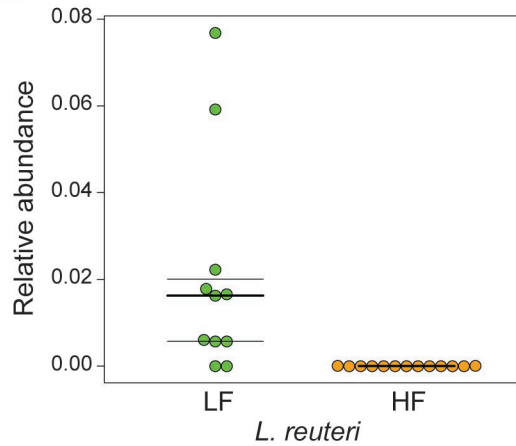

E

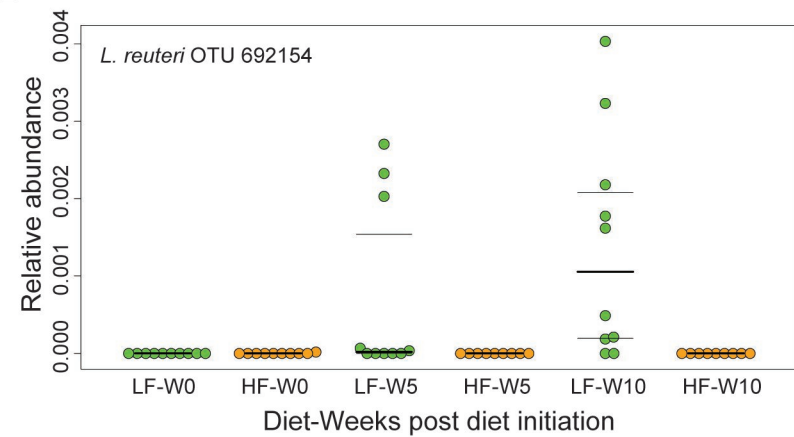

Figure 4 – Figure supplement 4

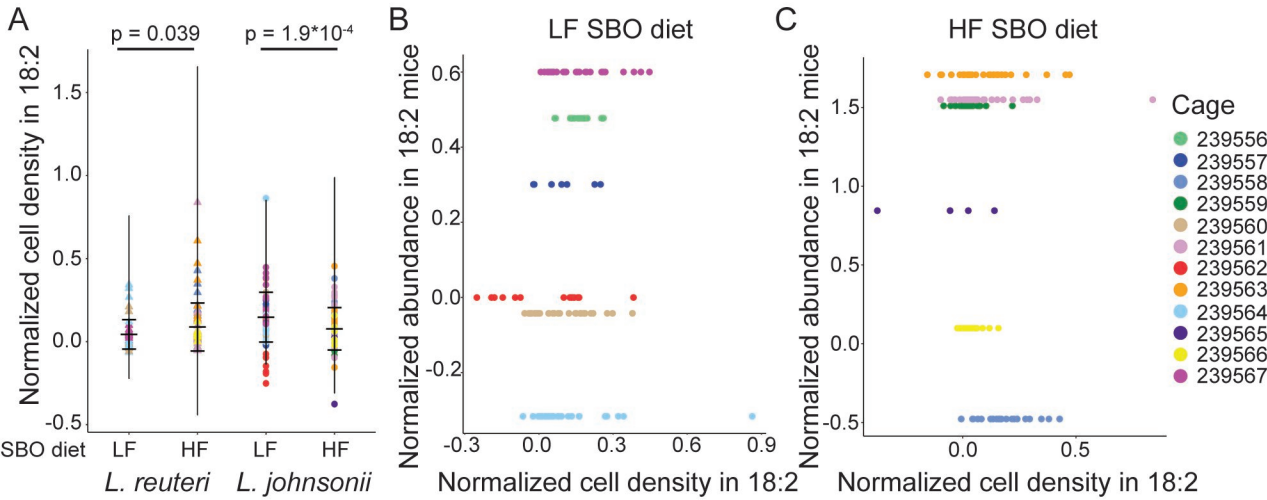

Figure 4 – Figure supplement 5

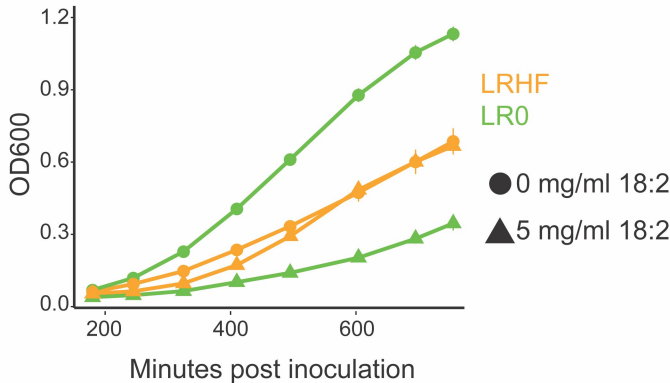

Source: https://www.biorxiv.org/content/10.1101/164715v2.full.pdf
